# Supplementary material for: Incidence, temporal trend and factors associated with ventilator-associated pneumonia in mainland China: a systematic review and meta-analysis
Source: PubMed Central journal article supplement (PMC5496595; doi:10.1186/s12879-017-2566-7), 2017-07-04
Supplement: 12879_2017_2566_MOESM1_ESM.pdf [file 12879_2017_2566_MOESM1_ESM.pdf]

## Additional file 1: Supplementary tables and figures

**Table S1.** Search strategies and results

| Database        | Search strategies                                                                                                                                                                                                                                                                                                                                                                                       | Restriction to recent years (2010-2015) |
|-----------------|---------------------------------------------------------------------------------------------------------------------------------------------------------------------------------------------------------------------------------------------------------------------------------------------------------------------------------------------------------------------------------------------------------|-----------------------------------------|
| Wanfang         | ((主题:(“肺炎”))* ((主题:(“前瞻”+“监测”+“随访”+“巢式病例对照”+“套叠式病例对照研究”+“队列”)) * (主题:(“发病”+“发生”))))                                                                                                                                                                                                                                                                                                                     | 2915                                    |
| CNKI            | (主题=“肺炎”) and (主题=“前瞻”+“监测”+“随访”+“巢式病例对照”+“套叠式病例对照研究”+“队列”) and (主题=“发病”+“发生”)                                                                                                                                                                                                                                                                                                                          | 2437                                    |
| CBM             | (“前瞻”+“监测”+“随访”+“巢式病例对照”+“套叠式病例对照研究”+“队列”) and (“发生”+“发病”) and (“肺炎”) [常用字段:智能]                                                                                                                                                                                                                                                                                                                         | 2800                                    |
| Medline<br>OVID | (( surveillance.mp. or exp surveillance/) or (prospective.mp. or exp prospective/) or (follow-up.mp. or exp follow-up/) or (cohort.mp. or exp cohort/) or (nested case-control.mp. or exp nested case-control/)) and (( Pneumonia.mp. or exp Pneumonia/ or ( pneumon*.tw.)) and (( China.mp. or exp China/ or ( Chinese.mp. or Chinese.tw.)) and (incidence.mp. or exp incidence/)                      | 39                                      |
| Embase<br>OVID  | (( surveillance.mp. or exp surveillance/) or (prospective.mp. or exp prospective/) or (follow-up.mp. or exp follow-up/) or (cohort.mp. or exp cohort/) or (nested case-control.mp. or exp nested case-control/)) and (( Pneumonia.mp. or exp Pneumonia/ or ( pneumon*.tw.)) and (( China.mp. or exp China/ or ( Chinese.mp. or exp Chinese/ or exp Han Chinese/)) and (incidence.mp. or exp incidence/) | 84                                      |
| Total           |                                                                                                                                                                                                                                                                                                                                                                                                         | 8275                                    |

**Table S2.** List of all the included studies

| No. | ID         | Reference                                                                                                                                                                                                                                   |
|-----|------------|---------------------------------------------------------------------------------------------------------------------------------------------------------------------------------------------------------------------------------------------|
| 1   | Cai 2010   | Cai XD, Cao Y, Chen C, Yang Y, Wang CQ, Zhang L, et al. [Investigation of nosocomial infection in the neonatal intensive care unit]. Chinese Journal of Contemporary Pediatrics. 2010; 12(2):81-84.                                         |
| 2   | Cai 2015   | Cai JP. [Hospital Infection Status and Prevention Measures in an ICU]. Chinese Rural Health Service Administration. 2015; 35(12):1523-1525.                                                                                                 |
| 3   | Chen 2010a | Chen HP. [Prevalence study and influence factors of nosocomial infection in ICU of the hospital in Jincheng anthracite mining group]. Unpublished Master Dissertation. Shanxi Medical School, 2010.                                         |
| 4   | Chen 2010b | Chen T, Liu Y, He Y, Qin GY, Chen M. [The impact of invasive procedure on hospital infections in patients in ICU]. Chinese General Practitioner. 2010; 13(32):3686-3687, 3691.                                                              |
| 5   | Chen 2010c | Chen XW, Luo XL, Xu SJ, Huang XY, Zhu YR. [Influencing Factors for Ventilator-associated Pneumonia in Pediatric ICU: A Logistic Regression Study and Distribution of Pathogens]. Chinese Journal of Nosocomiology. 2010; 20(21):3270-3272.  |
| 6   | Chen 2011a | Chen GL, Wu HL, He YQ, Yu JW. [Distribution of ventilator-associated pneumonia pathogens in intensive care unit and drug resistance surveillance]. Chinese Journal of Nosocomiology. 2011; 21(6):1244-1246.                                 |
| 7   | Chen 2011b | Chen XM. [Surveillance of pathogens from patients with hospital infection and analysis of drug resistance and hospital infection prevention in intensive care unit]. Unpublished Master Dissertation. Guangzhou Medical School, 2011.       |
| 8   | Chen 2012  | Chen FY, Wang ZY, Wang Y, Xiao C, Qiu SX, Wang SG. [Application of hospital infection monitor system in ventilator-associated pneumonia in ICU]. China Medical Herald. 2012; 9(31):50-51, 54.                                               |
| 9   | Chen 2013a | Chen CY. [Objective monitoring and evaluation of intervention for pneumonia after anesthesia]. Modern Journal of Integrated Traditional Chinese And Western Medicine. 2013; 22(10):1085-1087.                                               |
| 10  | Chen 2013b | Chen XW, Zhang XK, Luo XL. [Results of targeted surveillance of nosocomial infections from 2009 to 2011 and the changing trends]. Chinese Journal of Nosocomiology. 2013; 23(7):1507-1509.                                                  |
| 11  | Chen 2013c | Chen YH, Luo JQ. [Analysis of neonatal intensive care unit hospital infection targeted monitoring result]. Medical Innovation of China. 2013(12):43-44.                                                                                     |
| 12  | Chen 2013d | Chen WZ, Zhao Z, Huang YL, Lan ZX, Liang JW, Liang LC, et al. [Analysis of the pathogenic bacteria of ventilator associated pneumonia and control countermeasures in comprehensive ICU]. Journal of Tropical Medicine. 2013; 13(7):809-812. |
| 13  | Chen 2014  | Chen LL, Gui XL, Huang SF, Pan XP. [Distribution and drug resistance monitor of ventilator-associated pneumonia pathogens in ICU]. Chinese Journal of Disinfection. 2014; 31(1):33-34, 37.                                                  |
| 14  | Chen 2015a | Chen DW, Zhuang GH. [Analysis of risk factors and prevention strategies of targeted monitoring in ICU]. Gansu Medical Journal. 2015; 34(2):128-129.                                                                                         |
| 15  | Chen 2015b | Chen SM. [Effect of targeted monitoring of ventilator-associated pneumonia in ICU in Huai'an Second People's Hospital]. Chongqing Medicine. 2015; 44(2):274-275.                                                                            |
| 16  | Cheng 2013 | Cheng KP, Kong QF, Zhang XJ, Li JW, Wang CX. [The targeted surveillance and analysis of catheter associated infections in ICU]. Chongqing Medicine. 2013; 42(7):793-794.                                                                    |
| 17  | Cui 2012   | Cui RX, Shen SM, Jiang LH, Cui PF. [Targeted monitoring of nosocomial infections in ICU]. Chinese Journal of Nosocomiology. 2012; 22(10):2030-2032.                                                                                         |
| 18  | Deng 2015  | Deng NM, Wang H, Wang J, Huang M. [Observation on prospective monitoring and cluster intervention of nosocomial infection in intensive care unit of hospital]. Chinese Journal of Disinfection. 2015; 32(10):994-996.                       |
| 19  | Ding 2011  | Ding XY. [Results and analysis of investigations about the nosocomial infections among neonates in ICUs of Xining area]. Journal of High Altitude Medicine. 2011;                                                                           |

21(4):57-58.

- 20 Feng 2013 Feng XR, Li XY, Cui EH. [Ventilator-associated pneumonia in RICU and surveillance]. Chinese Journal of Nosocomiology. 2013; 23(22):5415-5416, 5479.
- 21 Fu 2010 Fu XF, Lu FS, R. H., Gu Q. [Effects on practice preventive measures of catheter-associated nosocomial infection in surgical intensive care unit]. Chinese Journal of Nosocomiology. 2010(12):1698-1699.
- 22 Fu 2011 Fu XF, Lu F, Shen RH, Gu QQ. [Efficacy of preventive intervention measures of catheter-associated nosocomial infection in intensive care units]. Chinese Journal of Infection Control. 2011; 10(1):22-25, 46.
- 23 Gao 2011 Gao FM, Zhang JX, Xu YE. [Analysis of targeted surveillance of ventilator-associated pneumonia in intensive care unit]. Medical Innovation of China. 2011; 8(2):30-31.
- 24 Gao 2014 Gao F, Zou JN, Luo QQ, Huang HY. [Analysis and results of targeted monitoring of hospital infections in general intensive care unit]. Journal of Nursing Science. 2014; 29(3):56-58.
- 25 Gao 2015a Gao HL, Meng CJ, Zhou LQ, Wang Q, Xue P. [Effect of airway management on the incidence of ventilator-associated pneumonia]. China Medical Device Information. 2015; 21(1):110-111.
- 26 Gao 2015b Gao XD, Hu BJ, Cui YW, Sun W, Shen Y. [A multicenter prospective monitoring on incidences of ventilator-associated pneumonia in 46 hospitals in China]. Chin J Infect Control. 2015; 14(8):540-543.
- 27 He 2015 He YG. [Application of oxygenation index window as switching for sequential invasive-noninvasive mechanical ventilator in treating ARDS]. Jiangsu Med J. 2015; 41(4):444-446.
- 28 Hou 2015 Hou ZM, Wu XC, Cheng Y, Yang W. [Targeted monitoring on intensive care unit in a hospital]. Chin J Infect Control. 2015; 14(2):127-129.
- 29 Hu 2012 Hu ZY, Shen BH, Li LH, Du YQ. [Incidence and pathogens of ventilator-associated pneumonia in a general intensive care unit of a primary hospital]. Chinese Journal of Infection Control. 2012; 11(2):141-142.
- 30 Huang 2011a Huang M. [Effectiveness of targeted monitoring with ICU ventilator associated pneumonia]. China Medicine and Pharmacy. 2011; 01(16):21-22.
- 31 Huang 2011b Huang QH. [Investigation and control measures of nosocomial infection in intensive care unit]. Journal of Community Medicine. 2011; 09(18):72-73.
- 32 Huang 2012 Huang B, Xue FY, Xie JZ, Yao JC, Lin XF. [Study of risk factors for ventilator-associated pneumonia in patients in ICU]. Fujian Medical Journal. 2012; 34(1):137-139.
- 33 Huang 2013 Huang GX, Ban LS, Liao D, Tang YP, Wei R, Mo WG, et al. [Impact of targeted monitoring on incidence of nosocomial infections in pediatric intensive care unit]. Chinese Journal of Nosocomiology. 2013; 23(22):5463-5465.
- 34 Huang 2014 Huang NN, Zhu MY, Zhang XX, Wu MS, Tan HJ, Liang YM, et al. [Study on the measures that may reduce the incidence of ventilator-associated pneumonia]. Chinese Journal of Disinfection. 2014:1343-1344.
- 35 Huang 2015a Huang Y, Han HJ, Ye Y, Chen JF, Jiang SF, Zhao CL. [Application of targeted surveillance of nosocomial infection in general ICU]. Chin J Emerg Resusc Disaster Med. 2015; 10(6):598-600.
- 36 Huang 2015b Huang YZ, Shan MZ, Zhao Q, Wang BC, Sun YH. [Effect of risk assessment on reduction of incidence of ventilator-associated pneumonia]. Chin J Nosocomiol. 2015; 25(21):4909-4910, 4967.
- 37 Jia 2011 Jia HX, Ren JH, Zhao XL, Li LY. [Research of interventions for device-associated infection in surgical intensive care unit]. Chinese Journal of Infection Control. 2011; 10:166-169.
- 38 Jia 2015 Jia W, Yang LX, Li YT, Xu JL, Dong Y, Zhang HW. [Targeted monitoring of nosocomial infections in intensive care unit of Tumor Hospital Affiliated to Xinjiang Medical University]. Chin J Infect Chemother. 2015; 15(6):517-522.
- 39 Jiang 2012a Jiang SF, Zhou J, Meng J, Liu Y. [Analysis and targeted surveillance in general intensive care unit]. Journal of Frontiers of Medicine. 2012; 02(19):50-51.

- 40 Jiang 2012b Jiang YH, Zhou H, Li Y, Shen L. [Target surveillance of nosocomial infections in ICU of 140 hospitals from Jiangsu Province 2011]. Chinese Journal of Nosocomiology. 2012; 22(21):4712-4714.
- 41 Jiang 2015 Jiang SF, Zhou J, Peng ML, Chen JF, Liu T, Dai YF. [Effect of targeted monitoring on prevention of ventilator-associated pneumonia in ICU]. Chin J Nosocomiol. 2015; 25(1):125-126, 138.
- 42 Kong 2012 Kong SM, Ju FM. [Targeted surveillance of nosocomial infections in ICU in a secondary-care hospital]. Chinese Journal of Misdiagnostics. 2012; 12(7):1620-1621.
- 43 Lei 2010 Lei SZ, Hu T, Dai PH. [Nursing cares and interventions for neonatal ventilator-associated pneumonia]. Contemporary Medicine. 2010(28):121-122.
- 44 Li 2011a Li MJ, Chen CH, Chen XY, Wang XM, Chen LN, Li L, et al. [Surveillance of Bacterial Colonization and Nosocomial Infections in Neonatal Intensive Care Unit]. Journal of Applied Clinical Pediatrics. 2011; 26(10):762-763, 783.
- 45 Li 2011b Li GX, Xu XF, Zhang YC, Yuan TW, Liu YY. [Analysis of nosocomial infections in ICU and its interferential measures]. Heilongjiang Medical Journal. 2011; 35(4):292-293.
- 46 Li 2012 Li WH, Deng M. [Surveillance and analysis of ventilator-associated pneumonia in general intensive care unit]. West China Medical Journal. 2012(9):1285-1288.
- 47 Li 2013a Li XH, Yang L, Zou AN, Deng H. [Targeted surveillance and intervention in ventilator-associated pneumonia in an intensive care unit]. Chinese Journal of Infection Control. 2013; 12(4):271-273.
- 48 Li 2013b Li Y, Sun DY, Jin XL. [Monitoring and analysis of catheter-related infections in ICU]. Chinese Journal of Nosocomiology. 2013; 23(5):996-997, 1035.
- 49 Li 2014a Li J. [Dynamic analysis on effect about intervention and targeted surveillance of nosocomial infections in general ICU]. Guangxi Medical Journal. 2014(11):1617-1619.
- 50 Li 2014b Li J. [Targeted monitor on healthcare-associated infection in a general intensive care unit]. Chinese Journal of Infection Control. 2014(8):475-478,499.
- 51 Li 2014c Li JM. [Analysis and results of targeted monitoring of nosocomial infection in ICU]. Journal of Qiqihar University of Medicine. 2014; 35(13):1896-1897.
- 52 Li 2015a Li JW, Wu LF, Yin WJ, Zong ZY, Zhu SC, Zhang H, et al. [Targeted monitoring on healthcare-associated infection in a respiratory intensive care unit of a teaching hospital]. Chin J Infect Control. 2015; 14(10):708-712.
- 53 Li 2015b Li LY, Li HS, Guo YH, Fan J, Meng L, Yao H, et al. [Strengthening competence building for preventing and controlling health-care-associated infection, improving healthcare-associated infection management level]. Chin J Infect Control. 2015;14(8):507-512.
- 54 Li 2015c Li M, Peng MQ, Chen QX, Xia XY. [The application of cluster intervention strategies on sedation and analgesia in children with mechanical ventilation]. Anhui Medical and Pharmaceutical Journal. 2015;19(11):2231-2233.
- 55 Li 2015d Li RJ, Yang XY, Hui JL, Li H, Pan MS, Yang LQ. [Target monitoring of nosocomial infection in ICU]. Anhui Medical and Pharmaceutical Journal. 2015; 19(7):1298-1301.
- 56 Liao 2013 Liao D, Huang GX, Ban L, Pan XN, Lai XF, Wei QF, et al. [Targeted surveillance of nosocomial infection in neonatal wards]. Chinese Journal of Neonatology. 2013; 28(3):163-166.
- 57 Lin 2011 Lin J, Liu SJ. [Targeted surveillance of nosocomial infection in comprehensive ICU]. Chinese Journal of Nosocomiology. 2011; 21(3):445-447.
- 58 Lin 2014 Lin J, Liu SJ. [Target surveillance of ventilator-associated pneumonia in a general intensive care unit]. Modern Preventive Medicine. 2014(24):4498-4499, 4505.
- 59 Lin 2015 Lin YR, Wei J. [Bundle treatments for patients with pulmonary tuberculosis and respiratory failure]. Chin J TCM WM Crit Care 2015; 22(3):291-294.
- 60 Liu 2010 Liu WP: [Study on risk factors for ventilator-associated pneumonia caused by pathogens]. Journal of Baotou Medical College. 2010; 26(2):28-29.
- 61 Liu 2011 Liu QX, Zhang SH, Zhang XY, Lin WZ. [The effects of targeted surveillance on preventing ventilator-associated pneumonia in intensive care unit]. Fujian Medical Journal. 2011; 33(2):68-69.
- 62 Liu 2013a Liu WQ. [Target monitoring of nosocomial infection in ICU]. Harbin Medical Journal. 2013; 33(1):46.
- 63 Liu 2013b Liu RL, Wei YH. [Targeted Surveillance Results Analysis of Nosocomial Infection in Comprehensive ICU]. Guide of China Medicine. 2013(24):411-412

- 64 Liu 2014 Liu XX, Huo HQ, Liang JT, Geng HM, Yin SF. [Targeted surveillance of nosocomial infections in ICUs of a general hospital]. Chinese Journal of Nosocomiology. 2014; 24(13):3220-3222.
- 65 Liu 2015a Liu J, Qi SY, Liu ZD, Yang SY. [Analysis of target surveillance of nosocomial infections in ICU]. Anhui J Prev Med. 2015; 21(4):273-276.
- 66 Liu 2015b Liu WP, Tian YQ, Cao QL, Qin LL, Li ZH. [Targeted surveillance of nosocomial infections in ICUs of 40 hospitals of Inner Mongolia autonomous region in 2014]. Chin J Nosocomiol. 2015; 25(11):2492-2494.
- 67 Liu 2015c Liu XP, Chen HP, Yan YT, Wei HJ. [Influence of intervention measure on morbidity of nosocomial infection in ICU]. Chin J Mod Drug Appl. 2015; 9(2):228-230.
- 68 Luo 2014 Luo JG, Zhu YH, Liu SL, Wang YP. [Targeted surveillance of NSICU]. Chinese Journal of Nosocomiology. 2014(10):2447-2449.
- 69 Ma 2012a Ma XH, Deng SY. [Study on the nursing intervention for ventilator-associated pneumonia in intensive care unit]. Journal of Practical Medical Techniques. 2012; 19(1):105-106.
- 70 Ma 2012b Ma LP, Ye H. [Monitoring and prevention of ventilator-associated pneumonia in ICU]. Jilin Medical Journal. 2012; 33(31):6863-6865.
- 71 Mai 2013 Mai JL, Chen H, Lin SY, Deng YL, Fu XL, Xian ZL. [Targeted surveillance and intervention of nosocomial infection in neonatal ward]. Journal of Guangdong Medical College. 2013; 31(4):395-396.
- 72 Mao 2010 Mao XQ, Tang CL, Yang CQ. [Ventilator-associated pneumonia in intensive care unit:a prospective study of relative risk factors]. Modern Preventive Medicine. 2010; 37(13):2567-2568.
- 73 Mao 2012 Mao YP, Han FZ, Zhou H, Zheng W, Zhai RX. [Targeted surveillance of catheter-associated infections in ICU]. Targeted surveillance of NSICU. 2012; 22(12):2506-2508.
- 74 Mi 2011 Mi CR, Zhang YB, Yang L, Li WH, Gu QY, Zhao YJ, et al. [Catheter-associated nosocomial infection in surgical intensive care unit: a 5 year data analysis]. Chinese Journal of Infection Control. 2011; 10(3):178-180,201.
- 75 Ming 2012 Ming SL, Liao CJ, Zou XM, Zhang HL. [Integrated ICU Hospital Infection Targeted Research]. Medical Innovation of China. 2012; 10(10):150-151.
- 76 Pan 2013a Pan JE, Wu YY, Rong YK. [Target monitoring of ventilator-associated pneumonia in neonatal intensive care unit]. China Medicine and Pharmacy. 2013(11):25-26, 32.
- 77 Pan 2013b Pan J, Zhao YP. [Target monitoring of nosocomial infection in ICU]. Medical Innovation of China. 2013(31):136-137,138.
- 78 Peng 2013 Peng R, Xing JL, Zhu WG. [Results and analysis of targeted surveillance of hospital-acquired infections in ICU]. West China Medical Journal. 2013(8):1179-1181.
- 79 Pu 2011 Pu D, Shu MR, Zhang WD, Tan C, Zong ZY, Liu HH, et al. [Target monitoring of nosocomial infection in ICU]. Medical Journal of West China. 2011; 23(12):2330-2332.
- 80 Qi 2010a Qi YF. [Investigation and analysis of related factors of ventilator-associated pneumonia in ICU]. Chinese Journal of Practical Nursing. 2010; 26(30):64-65.
- 81 Qi 2010b Qi CY. [The assessment of bronchial mucosa biopsy and quantitative culture of bacterial in patients muff-drug resistant bacterial associated with invasive ventilation]. Unpublished Master Dissertation. Hebei Medical School, 2010.
- 82 Qi 2013 Qi SY, Ma XH, Liu ZD, Li L. [Analysis of risk factors for ventilator-associated pneumonia in comprehensive ICU and nursing strategy]. Chinese Journal of Modern Nursing. 2013; 19(21):2531-2533.
- 83 Qian 2015 Qian LH, Wang ZL, Zhu JR, Cui Z. [Analysis of nosocomial infection objective monitoring in intensive care unit]. Chinese Journal of General Practice. 2015; 13(8):1273-1274, 1343.
- 84 Qu 2011 Qu F, Wu SZ, Sheng Y, Yao WS. [Analysis of targeted surveillance of nosocomial infections in neurosurgical intensive care unit in 154 hospitals]. Practical Journal of Medicine Pharmacy. 2011; 28(6):542-543.
- 85 Qu 2015 Qu D, Ren XX, Guo LY, Xu WJ, Liang JX, Han YH, et al. [The characteristics of bacterial biofilm formation in endotracheal tubes in ventilated patients and the relationship between the biofilm and ventilator-associated pneumonia]. Chin Pediatr Emerg Med. 2015; 22(4):237-240.

- 86 Ren 2012 Ren JH, Jia HX, Feng Q, Wang Y, Li YL. [Characteristics of nosocomial infections in NICU and targeted monitoring]. Chinese Journal of Nosocomiology. 2012; 22(12):2501-2502, 2505.
- 87 Ren 2015 Ren JH, Yin H, Wu AH, Hu BJ, Zhang XY, Hou TY, et al. [Multicenter study on epidemiology of device-associated infection in neonatal intensive care units]. Chin J Infect Control. 2015; 14(8):530-534.
- 88 Shen 2010 Shen Y. [Study on target monitoring applied in monitoring ventilator associated pneumonia in intensive care unit]. Nursing and Rehabilitation Journal. 2010; 09(12):1017-1019.
- 89 Sheng 2015 Sheng B, Ye Y, Li JB. [Targeted surveillance of nosocomial infections in intensive care units in 2013]. Chin J Infect Chemother. 2015; 15(5):443-446.
- 90 Shu 2015a Shu DD. [Application of fiberoptic bronchoscopy and conventional sputum suction therapy on prevention of ventilator-associated pneumonia]. Journal of Clinical Pulmonary Medicine. 2015; 20(4):698-701.
- 91 Shu 2015b Shu H, Wei H, Li J, Zhang CL, Xu Q. [Clinical practice of multidimensional strategy to reduce neonatal ventilator-associated pneumonia]. J Clin Pediatr. 2015; 33(5):445-449.
- 92 Situ 2015 Situ MQ, Li ZY, Zheng L. [Targeted monitoring and control of ventilator associate pneumonia]. Chin J Nosocomiol. 2015; 25(7):1558-1564.
- 93 Song 2013 Song K, Zhao LX, Yang L, Wu LY. [Target surveillance of ventilator-associated pneumonia in intensive care unit]. For All Health. 2013; 7(7):49.
- 94 Song 2015 Song L. [Target monitoring of hospital infection in ICU]. Journal of Hebei Medical University. 2015; 36(4):457-459.
- 95 Sun 2015 Sun JH, Xu SC, Wen L, Zhang LJ, Yan HP. [Analysis of the monitoring results of ICU ventilator associated events]. West China Medical Journal. 2015; 30(2):241-242.
- 96 Tang 2012a Tang J, Ye HL, Peng JF, Li CZ, Gao H. [Target surveillance and analysis of nosocomial infection in general ICU]. Medical Journal of Chinese People's Health. 2012; 24(6):679.
- 97 Tang 2012b Tang SQ, Yu Q, Jiang R, Yan JX, Cao XW. [Comparison of nosocomial infection by objective surveillance in icu]. Chinese Journal of Disinfection. 2012; 29(6):506-508.
- 98 Tang 2013 Tang YM, Xie LJ, Wu J. [Targeted surveillance of nosocomial infections in NICU]. Chinese Journal of Nosocomiology. 2013; 23(11):2654-2656.
- 99 Tang 2015 Tang HP, Gao XD, Fan CS, Sun SS, Zhang YW. [Effect of active screening plus integrated intervention on prevention of multidrug-resistant organisms infections in ICU patient]. Chin J Nosocomiol. 2015; 25(11):2484-2486.
- 100 Wang 2010a Wang XJ, Jiang RM, Xu YL, Zhang W, Huang JK, Wang YB, et al. [The analysis of the clinical features between survivors and non-survivors with the severe form of new influenza A (H1N1) viral infection]. Chinese Journal of Tuberculosis and Respiratory Diseases. 2010; 33(6):406-410.
- 101 Wang 2010b Wang XY. [Pathogens isolated from breathing circuit of patients with mechanical ventilation in general intensive care unit: analysis and intervention]. Unpublished Master Dissertation. Nanfang Medical School, 2010.
- 102 Wang 2010c Wang XW, Gu KJ, Zhong XJ, Tao JM, Zhu YF. [Analysis of the pathogens from endotracheal aspirate cultures in patients with ventilator-associated pneumonia]. Clinical Medicine of China. 2010; 26(3):289-291.
- 103 Wang 2011a Wang B. [Analysis on Target Monitoring and intervention of Catheter - associated Nosocomial Infection in SICU]. Xinjiang Medical Journal. 2011; 41(3):26-29.
- 104 Wang 2011b Wang HM, Wang L, Liu FF. [Investigation of VAP-preventive nursing practice in ICU patients]. Journal of Nursing Science. 2011; 26(13):85-86.
- 105 Wang 2011c Wang H. [The value of quantitative culture of bacteria got by PSB combining with bacterial mucosa biopsy in MV patients with multi-drug resistant bacteria]. Unpublished Master Dissertation. Hebei Medical School, 2011.
- 106 Wang 2012 Wang K. [Clinical analysis of etiology of ventilator-associated pneumonia in CSICU]. Chinese Journal of Nosocomiology. 2012; 22(23):5227-5229.
- 107 Wang 2013a Wang AC, Xie M, Liu WL. [Analysis of the target monitoring of nosocomial infection in ICU]. Chinese Journal of Modern Nursing. 2013; 19(29):3673-3676.
- 108 Wang 2013b Wang XP, Yang YP. [Target monitoring of nosocomial infections in ICU and analysis of risk factors]. Chinese Journal of Nosocomiology. 2013; 23(15):3594-3596

- 109 Wang 2013c Wang QH. [A clinical analysis of 59 cases of ventilator-associated pneumonia in intensive care unit]. *China Foreign Medical Treatment*. 2013(31):21-23.
- 110 Wang 2013d Wang YL, Yang XH, Wang H, Zhao Z, Yan Y. [Target monitoring of nosocomial infection in ICU]. *Medical Information*. 2013; 26(30):171-172.
- 111 Wang 2014a Wang HH. [The prevention and control experience about ventilator-associated pneumonia (VAP) with PDCA]. *Journal of Henan Medical College for Staff and Workers*. 2014; 26(1):46-48.
- 112 Wang 2014b Wang L, Sun HZ, Cui XH, Huang JH. [Investigation and analysis of risk factors of ICU-acquired pneumonia]. *Journal of Qilu Nursing*. 2014(2):67-68.
- 113 Wang 2014c Wang QQ, Su WD, Zhang WW, Lin ZL. [Targeted surveillance and risk factors on preterm infants with nosocomial infections]. *Chinese Journal of Neonatology*. 2014; 29(4):233-237.
- 114 Wang 2015a Wang XB, You RK, Shao ZZ, Chen MH. [Targeted monitoring of nosocomial infections in general ICU]. *Chin J Nosocomiol*. 2015; 25(1):116-118.
- 115 Wang 2015b Wang J, Chen MY, Huang J. [Targeted surveillance of nosocomial infections in general ICU]. *Chin J Nosocomiol*. 2015; 25(10):2242-2243, 2264.
- 116 Wang 2015c Wang L. [Intervention in healthcare-associated infection in a neonatal intensive care unit]. *Chin J Infect Control*. 2015; 14(12):830-833.
- 117 Wang 2015d Wang W. [Target monitoring of ventilator-associated pneumonia in neonatal intensive care unit]. *Maternal and Child Health Care of China*. 2015; 30(5):721-722.
- 118 Wei 2010 Wei LY, Ye XZ, Li ZM, Qiu YT. [Targeted monitoring on nosocomial infection in a neonatal intensive care unit]. *South China Journal of Preventive Medicine*. 2010(2):48-50.
- 119 Wei 2012 Wei Y, Yu LL, Re YH, Ding LL, Wang P, Gu XT. [Targeted monitoring of nosocomial infections in ICU]. *Chinese Journal of Nosocomiology*. 2012; 22(19):4199-4201.
- 120 Wei 2013 Wei Y, Wang P, Ding LL, Yu LL, Gu XT, Ma ZY. [Implications for control of nosocomial infections in intensive care unit]. *Chinese Journal of Infection and Chemotherapy*. 2013:438-441.
- 121 Wen 2013 Wen SQ. [Cluster of care preventing ventilator associated pneumonia: case-control study]. *Journal of Frontiers of Medicine*. 2013(18):39-40
- 122 Wu 2012 Wu XL, Wu ZJ, Zhang YL, He SL, Zhu YP. [Targeted monitoring on healthcare-associated infection in a neonatal intensive care unit in 2010]. *Chinese Journal of Infection Control*. 2012; 11(4):278-281.
- 123 Wu 2013 Wu HM, Xu ZQ, Jin XG, Chen YF, Gao SC, Cheng HJ. [Analysis and target surveillance of ventilator-associated pneumonia in intensive care unit]. *Zhejiang Medical Journal*. 2013(12):1206-1208.
- 124 Wu 2015 Wu XP, Wang JP. [Targeted monitoring of nosocomial infections in ICU]. *Hebei Medical Journal*. 2015; 37(11):1723-1725.
- 125 Xiang 2014 Xiang XL, Song XY, Zheng XH, Yang QQ. [Targeted Surveillance to Hospital Infection in Intensive Care Unit]. *West China Medical Journal*. 2014(3):432-435.
- 126 Xie 2011 Xie JL, Qin Y, Qian QZ, Shi CJ. [Monitoring of influenza A H1N1 nosocomial infection]. *Jiangsu Healthcare Administration*. 2011; 22(6):80-81.
- 127 Xie 2014 Xie DS, Ming X, Hu Y, Luo QQ, Fu XY, Wang HF, et al. [Distribution and drug resistance of pathogens causing ventilator-associated pneumonia]. *Chinese Journal of Nosocomiology*. 2014(21):5245-5246, 5257.
- 128 Xing 2012 Xing HL, Tian HZ, Yuan ZH, Liu G. [Changes of pathogens distribution and targeted surveillance after the ICU moving into the laminar air flow ward]. *Guide of China Medicine*. 2012(24):429-431.
- 129 Xing 2013 Xing HL, Yang J, Yin XL. [Target monitoring in 75 newborns in intensive care unit]. *Medical Information*. 2013(28):303-303,304.
- 130 Xu 2010a Xu HM, Wang JM, Qie GL, Liu HT, He JZ. [Risk Factors and Pathogens in Elderly Patients with Ventilator-associated Pneumonia]. *Chinese Journal of Nosocomiology*. 2010; 20(4):494-496.
- 131 Xu 2010b Xu Z, Tang SQ, Cao XW, Yu Q, Rao XY. [Targeted Surveillance of Nosocomial Infection in Neonatal Wards]. *Chinese Journal of Nosocomiology*. 2010; 20(21):3324-3326.
- 132 Xu 2014a Xu XL, Liang YP, Yang P, Ma WC, Hou C. [Nosocomial infection targeted monitoring analysis and prevention measures in ICU]. *Chinese Journal of Nosocomiology*. 2014(8):1902-1904.

- 133 Xu 2014b Xu Y, Wang WJ, Xu RL, Zhou T. [Analysis of Surveillance and Risk Factors of Ventilator-associated Pneumonia in a Pediatric Intensive Care Unit]. *Modern Preventive Medicine*. 2014(8):1530-1532.
- 134 Xue 2014 Xue JL, Zhang X, Fan HY. [Analysis of targeted monitoring of nosocomial infections in general ICU]. *Chinese Journal of Nosocomiology*. 2014; 24(3):627-629.
- 135 Xue 2015 Xue FG. [Effect of Cluster Intervention Strategies on Ventilator Associated Pneumonia]. *Medical Information*. 2015; 28(47):107-108.
- 136 Yan 2014 Yan SZ, Bu GL, Miao L, Wang H. [Analysis of relevant factors for nosocomial infection in ICU]. *Chinese Journal of Nosocomiology*. 2014(24):6112-6113, 6121.
- 137 Yang 2012 Yang YH, Lu LH, Wu XF. [Target monitoring and analysis of ventilator-associated pneumonia]. *Chinese Journal of Nosocomiology*. 2012; 22(15):3245-3247.
- 138 Yang 2013 Yang SZ, Cheng KP. [Surveillance on healthcare-associated infection in patients in an intensive care unit]. *Chinese Journal of Infection Control*. 2013; 12(6):466-467, 470.
- 139 Yang 2014a Yang HN, Wang P, Chen JH, Zhang N. [Net surveillance and intervention study of the ventilator associated pneumonia]. *Chinese Journal of Disinfection*. 2014; 31(1):50-51, 54.
- 140 Yang 2014b Yang J, Dong CM, Li JY, Zhang HS, Zhang H, Zhu RX, et al. [Ventilator bundle treatment of acute respiratory distress syndrome and its correlation with biomarkers of inflammation]. *Chinese Critical Care Medicine*. 2014; 26(8):544-548.
- 141 Yang 2014c Yang J, Wang HY, Liang H, Xi JJ, Cheng R. [Prospective study of risk factors in ventilator-associated pneumonia in mechanically ventilated patients in ICU]. *Chinese Journal of Emergency*. 2014; 23(11):1239-1243.
- 142 Yang 2014d Yang XL, Du XY, Zhou YL. [Analysis of the targeted surveillance of nosocomial infection in intensive care unit and the corresponding management tactics]. *Today Nurse*. 2014(8):141-142.
- 143 Yang 2015a Yang XX, Xing YW, Ma M, Chen JZ, Wang Y, Liu Y, et al. [Target monitoring of nosocomial infection in a Tumor Hospital ICU]. *Modern Preventive Medicine*. 2015; 42(7):1336-1338.
- 144 Yang 2015b Yang ZY, Shen ZX, Wen MD, Lu YC. [Effect of automatic control of air pressure suction combined with continuous subglottic on ventilator-associated pneumonia]. *Chin J Mod Nurs*. 2015; 21(20):2466-2468.
- 145 Yao 2015 Yao LL. Present Situation Investigation and Drug Resistance Analysis of Nosocomial Infection Pathogens in Intensive Care Unit. Unpublished Master Dissertation. Hebei Medical University, 2015.
- 146 Ye 2014 Ye H, Fan HY, Qian AP, He WF, Chen YH. [Target surveillance of ventilator-associated pneumonia]. *Clinical Education of General Practice*. 2014(2):215-217.
- 147 Ying 2011 Ying RL. [Target Monitoring and Control of Ventilator-Associated Pneumonia in Neonatal Intensive Care Unit]. *Chinese General Practitioner*. 2011; 14(27):3154-3155.
- 148 Ying 2013 Ying RL. [Study on the effect of ventilator bundle intervention strategies in prevention of neonatal ventilator-associated pneumonia]. *Maternal & Child Health Care of China*. 2013; 28(34):5720-5722.
- 149 You 2012 You WQ, Tang GY. [The effects of non-drug prevention on preventing ventilator-associated pneumonia in ICU]. *Medical Innovation of China*. 2012; 9(2):122-123.
- 150 Yu 2011a Yu HT, Jia JG, Wang M, Zang JP, Liu YH. [Analysis of Risk Factors for Ventilator-Associated Pneumonia in Mechanically Ventilated Patients in Respiratory Intensive Care Unit]. *Chinese Journal of Respiratory and Critical Care*. 2011; 10(1):69-71.
- 151 Yu 2011b Yu GL, Chen CH, Xu CL, Lin RH, Zhang C. [Target surveillance of ventilator-associated pneumonia in intensive care unit]. *Chinese Journal of Nosocomiology*. 2011; 21(23):4941-4943.
- 152 Yu 2012a Yu H, Yang HY, Liu YM. [Risk factors for ventilator-associated pneumonia in an intensive care unit: a prospective study]. *Shanxi Medical Journal*. 2012; 41(11):1121-1123.
- 153 Yu 2012b Yu LX, Q. CQ, Wang HP. [Survey on the current status of nosocomial infections in ICU]. *Chinese Journal of Disinfection*. 2012; 29(1):37-38.
- 154 Yu 2014 Yu ZR, Liu QH, Xu GF. [Surveillance of ventilator-associated pneumonia in intensive care unit and the nursing interventions]. *Medical Information*.



2014(32):320-321.

- 155 Yu 2015a Yu H, Zhu JM, Hu K. [Effect of Bundle Intervention Strategies on the Incidence of Ventilator Associated Pneumonia]. Chinese Journal of Disinfection. 2015; 32(9):939-941.
- 156 Yu 2015b Yu HH, Shao XP. [Clinical Trial of Oral Care Combined with Tooth Brushing in Preventing Ventilator-associated Pneumonia and Relevant Adverse Events]. Nurs J Chin PLA. 2015; 32(21):39-42.
- 157 Yu 2015c Yu YH, Ni FY, Shen B. [Effect of target monitoring in the control of ventilator associated pneumonia in ICU]. Jiangsu Healthcare Administration. 2015; 26(5):42-44.
- 158 Yuan 2011 Yuan XN, Xie XS, Ma XM. [Surveillance and analysis of nosocomial infections in ICU in certain 3A Beijing hospitals]. Chinese Nursing Management. 2011(10):47-49.
- 159 Yue 2015 Yue MK, Liu FR, Zhao L, Zhang FS, Wang CT. [A multicenter clinical study of bundle treatment for moderate or severe acute respiratory distress syndrome]. Chin Crit Care Med. 2015; 27(7):601-605.
- 160 Zeng 2014 Zeng CH, He J, Li XM, Zhang CL, Zhong H. [Analysis of clinical outcomes of patients with mechanical ventilation in the intensive care unit]. West China Medical Journal. 2014; 03:461-462.
- 161 Zhang 2010a Zhang YW. [Effectiveness of bundle for the incidence of Ventilator-associated pneumonia]. Unpublished Master Dissertation. Fudan University, 2010.
- 162 Zhang 2010b Zhang JG, Peng ZL, Liu Z, Zhang N. [Surveillance and distribution of pathogens isolated from patients with neonatal ventilator-associated pneumonia in Yulin city in 2009]. Guide of China Medicine. 2010; 8(12):108-109.
- 163 Zhang 2011a Zhang HP, Zhang YQ, Zheng D, Yang YM, Li SG. [Target monitoring of nosocomial infection in general intensive care unit]. Chinese Journal of Nosocomiology. 2011; 21(1):49-51.
- 164 Zhang 2011b Zhang LY. [Targeted surveillance of ventilator-associated pneumonia in an intensive care unit]. Journal of Practical Medical Techniques. 2011; 18(1):22.
- 165 Zhang 2011c Zhang WH, Yi GZ, Yuan Z, Huang WX, Du YP, Su XQ. [Target monitoring of nosocomial infection in intensive care unit]. Chongqing Medicine. 2011; 40(34):3457-3459.
- 166 Zhang 2011d Zhang WH, Yuan Z, Huang WX, Du YP, Yi GZ, Su XQ. [Analysis and strategies of targeted surveillance for nosocomial infection in ICU ward of pulmonary medicine]. Chongqing Medicine. 2011; 40(36):3657-3659.
- 167 Zhang 2011e Zhang XQ. [Targeted surveillance on hospital infection in intensive care unit]. Modern Preventive Medicine. 2011; 38(19):3946-3947, 3957.
- 168 Zhang 2011f Zhang YQ, Gan MX, Lin X, Xiao ZM, Guo YY. [Targeted surveillance and intervention in reducing ventilator-associated pneumonia]. Chinese Journal of Infection Control. 2011; 10(1):30-32.
- 169 Zhang 2012a Zhang ZQ. [Mechanical ventilation in patients with ventilator-associated pneumonia risk factors and prognosis]. Unpublished Master Dissertation. Shandong University, 2012.
- 170 Zhang 2012b Zhang P, Zhou XC, Fan SH. [Analysis of nosocomial infections in an intensive care unit]. Journal of Snake. 2012; 24(2):144-146.
- 171 Zhang 2013a Zhang WY, Tan J, Yu SY. [Analysis of risk factors of ventilator-associated pneumonia]. Jiangxi Medical Journal. 2013(12):1304-1305.
- 172 Zhang 2013b Zhang P, Wang GM, Jiao JY, Qin CL, Ge M. [Targeted surveillance on nosocomial infection and analysis on intervention effect in integrated ICU]. Occupation and Health. 2013; 29(3):360-362.
- 173 Zhang 2014a Zhang XQ, Zhao X. [Targeted monitoring of nosocomial infections in intensive care unit]. Journal of Medical Forum. 2014(3):82-83.
- 174 Zhang 2014b Zhang Y, Wu ST. [The results of targeted surveillance of nosocomial infections in a neonatal intense care unit]. Chinese Journal of Modern Drug Application. 2014(24):217-218.
- 175 Zhang 2014c Zhang JY, Lu F, Gu HF. [Analysis of the targeted monitoring of nosocomial infections in neonatal intensive care unit]. Chinese Journal Of Public Health Engineering. 2014(2):157-158, 161.

- 176 Zhang 2015a Zhang RY. [Application of the artificial airway gasbag pressure in patients with mechanical ventilation]. *China Prac Med*. 2015; 10(5):270-271.
- 177 Zhang 2015b Zhang SM, Zhu Y, Pan YY, Zhuang JW, Zhang JH. [Research on effects of management modes on reduction of incidence of ventilator-associated pneumonia in ICU patients]. *Chin J Nosocomiol*. 2015; 25(11):2505-2507.
- 178 Zhang 2015c Zhang XX, Zuo ZL. [Clinical research of  $\epsilon$ -polylysine in the prevention of ventilator-associated pneumonia for children with mechanical ventilation in PICU]. *Chin J Mod Nurs*. 2015; 21(3):249-253.
- 179 Zhao 2012a Zhao Z, He HM, Shen XP, Tan QF. [Target surveillance of ventilator-associated pneumonia in inpatients during 2009-2011]. *Journal of Qiqihar University of Medicine*. 2012; 33(13):1783-1785.
- 180 Zhao 2012b Zhao N, Dong XB, Hao MM, Zhang Y, Zhao LY. [Targeted surveillance of nosocomial infection in ICU]. *Chinese Journal of Aesthetic Medicine*. 2012; 21(16):435-436.
- 181 Zhao 2013 Zhao LH, Chen CF, Chen CY, Zou YC, Kong DB. [Targeted surveillance of nosocomial infections in ICU in 2012]. *Chinese Journal of Nosocomiology*. 2013; 23(20):4883-4884, 4887.
- 182 Zhao 2014a Zhao DY, Guo QZ, Zhang SP. [Distribution and drug resistance of pathogens causing ventilator-associated pneumonia in children]. *Chinese Journal of Nosocomiology*. 2014; 24(6):1523-1525.
- 183 Zhao 2014b Zhao DY, Zhou Y, Situ XM. [Targeted monitoring of nosocomial infections in Pediatric CICU]. *Chinese Journal of Nosocomiology*. 2014(8):2039-2041.
- 184 Zhao 2015 Zhao XB. The effect of comprehensive intervention measures on the incidence of ventilator associated pneumonia in ICU. Unpublished Master Dissertation. Hebei Medical University, 2015.
- 185 Zhong 2013 Zhong Y. [Study on the bundled care program in preventing ventilator-associated pneumonia]. *World Health Digest*. 2013(23):321-322.
- 186 Zhou 2013a Zhou H, Jiang YH, Shen L, Li Y, Zheng W, Han FP, et al. [Targeted surveillance of nosocomial infections in ICUs between grade 2 and grade 3 hospitals: a comparative study]. *Chinese Journal of Nosocomiology*. 2013; 23(7):1515-1517.
- 187 Zhou 2013b Zhou L. [Targeted Surveillance of Nosocomial Infection in Intensive Care Unit]. *Chongqing Medicine*. 2013; 42(1):69-71.
- 188 Zhou 2013c Zhou X, Huang GX, Chen XX, Li YJ, Qu HH. [Targeted surveillance and interventions on nosocomial infection in an intensive care unit]. *Journal of Chongqing Medical University*. 2013(07):729-732.
- 189 Zhu 2010 Zhu Q, Yang BZ. [Targeted surveillance of Nosocomial Infection in neurological ICU]. *Journal of Ningxia Medical University*. 2010; 32(3):384-387.
- 190 Zhu 2014a Zhu H, Gu J, Ma J. [Targeted monitoring and interventions in ICU of general hospital]. *Chinese Journal of Nosocomiology*. 2014(17):4382-4384.
- 191 Zhu 2014b Zhu Y, Zhang SM, Pan YY, Zhuang JW. [Effect of targeted monitoring on control of nosocomial infections in department of critical care medicine]. *Chinese Journal of Nosocomiology*. 2014(16):4133-4135.
- 192 Zong 2013 Zong YZ, Chen LP, Xu XX, Zou QY, Li HF. [Analysis and improvement of targeted surveillance of nosocomial infections in general ICU]. *International Journal of Nursing* 2013; 32(9):2132-2134.
- 193 Zou 2013 Zou JN, Zhu M, Huang HY, Wu YY, Deng M, Xiong LJ. [Surveillance of catheter-related infections in ICU during 2011-2012]. *Chinese Journal of Nosocomiology* 2013; 23(24):5969-5970, 5973.
- 194 Zou 2015 Zou WH, Guo YX, Chang YJ, Wei Y, Hu YM, Wu MX. [Target monitoring and nursing strategy of nosocomial infection in PICU]. *The World Clinical Medicine*. 2015; 9(5):248-249.
- 195 Zuo 2015 Zuo YS, Luo SH. [Surveillance on healthcare-associated infection in a neonatal intensive care unit of a hospital for three consecutive years]. *Chin J Infect Control*. 2015; 14(1):45-47.
-

**Table S3.** General information of all the included studies

| Study ID   | Risk of bias | Province  | Start    | Finishing | Study design | Clinical department <sup>a</sup> | Hospital level            | Diagnostic criteria <sup>b</sup>                   | VAP patients per 1000 ventilator-days | VAP episodes per 1000 ventilator-days | Cumulative incidence |
|------------|--------------|-----------|----------|-----------|--------------|----------------------------------|---------------------------|----------------------------------------------------|---------------------------------------|---------------------------------------|----------------------|
| Cai 2010   | low          | Shanghai  | Feb 2006 | Jan 2007  | Surveillance | NICU                             | Tertiary                  | Others                                             |                                       | √                                     |                      |
| Cai 2015   | moderate     | Zhejiang  | Mar 2013 | Jul 2014  | Surveillance | ICU                              | Non-tertiary              | Unclear                                            | √                                     |                                       |                      |
| Chen 2010a | low          | Shanxi    | Sep 2008 | Dec 2009  | Surveillance | ICU                              | Tertiary                  | Criteria by Chinese Thoracic Society in 1999       |                                       | √                                     |                      |
| Chen 2010b | low          | Guizhou   | Apr 2009 | Mar 2010  | Surveillance | ICU                              | Tertiary                  | Criteria by the Chinese Ministry of Health in 2001 |                                       |                                       | √                    |
| Chen 2010c | low          | Jiangxi   | Jan 2008 | Dec 2008  | Surveillance | PICU                             | Tertiary                  | Criteria by Chinese Thoracic Society in 1999       |                                       |                                       | √                    |
| Chen 2011a | moderate     | Jiangxi   | Jan 2007 | Jan 2008  | Surveillance | ICU                              | Tertiary                  | Others                                             |                                       |                                       | √                    |
| Chen 2011b | moderate     | Guangdong | Jan 2009 | Dec 2010  | Surveillance | General ICU                      | Tertiary                  | Criteria by the Chinese Ministry of Health in 2001 |                                       | √                                     |                      |
| Chen 2012  | low          | Hubei     | Jan 2010 | Oct 2011  | Surveillance | ICU                              | Non-tertiary              | Criteria by the Chinese Ministry of Health in 2001 | √                                     |                                       | √                    |
| Chen 2013a | low          | Hebei     | May 2010 | May 2011  | Surveillance | ICU                              | Non-tertiary              | Criteria by Chinese Thoracic Society in 1999       |                                       |                                       | √                    |
| Chen 2013b | low          | Jiangxi   | Jul 2009 | Jun 2011  | Surveillance | Unclear                          | Tertiary and Non-tertiary | Criteria by the Chinese Ministry of Health in 2001 | √                                     |                                       | √                    |
| Chen 2013c | moderate     | Guangxi   | Mar 2011 | Feb 2012  | Surveillance | NICU                             | Tertiary                  | Criteria by the Chinese Ministry of Health in 2001 |                                       | √                                     |                      |
| Chen 2013d | low          | Guangdong | Jan 2009 | Dec 2011  | Surveillance | General ICU                      | Non-tertiary              | Others                                             |                                       |                                       | √                    |
| Chen 2014  | low          | Jiangxi   | Jan 2010 | Dec 2011  | Surveillance | ICU                              | Tertiary                  | Others                                             |                                       |                                       | √                    |
| Chen 2015a | low          | Shaanxi   | Sep 2013 | Nov 2013  | Surveillance | ICU                              | unclear                   | Criteria by the Chinese Ministry of Health in 2001 |                                       | √                                     |                      |
| Chen 2015b | low          | Jiangsu   | Jul 2012 | Jun 2013  | Surveillance | General ICU                      | Tertiary and Non-tertiary | Criteria by Chinese Thoracic Society in 1999       | √                                     | √                                     |                      |
| Cheng 2013 | low          | Jiangsu   | Jan 2011 | Dec 2011  | Surveillance | ICU                              | Tertiary                  | Criteria by the Chinese Ministry of Health in 2001 | √                                     |                                       |                      |
| Cui 2012   | low          | Jiangsu   | Jan 2010 | Dec 2010  | Surveillance | ICU                              | Tertiary                  | Criteria by the Chinese                            | √                                     |                                       |                      |

|             |          |              |          |          |                          |                                                                                   |                           |                                                    |   |   |
|-------------|----------|--------------|----------|----------|--------------------------|-----------------------------------------------------------------------------------|---------------------------|----------------------------------------------------|---|---|
|             |          |              |          |          |                          |                                                                                   |                           | Ministry of Health in 2001                         |   |   |
| Deng 2015   | moderate | Shandong     | Jan 2011 | Dec 2013 | Surveillance             | ICU                                                                               | Tertiary                  | Criteria by the Chinese Ministry of Health in 2001 |   | √ |
| Ding 2011   | low      | Qinghai      | Jan 2009 | Dec 2010 | Surveillance             | NICU                                                                              | Tertiary                  | Criteria by the Chinese Ministry of Health in 2001 |   | √ |
| Feng 2013   | moderate | Zhejiang     | Jan 2008 | Dec 2012 | Surveillance             | RICU                                                                              | Tertiary                  | Criteria by Chinese Thoracic Society in 1999       |   | √ |
| Fu 2010     | low      | Shanghai     | Jan 2006 | Dec 2009 | Surveillance             | SICU                                                                              | Tertiary                  | Criteria by the Chinese Ministry of Health in 2001 | √ |   |
| Fu 2011     | low      | Shanghai     | Jan 2006 | Dec 2009 | Surveillance             | Medical ICU, SICU, Neurosurgery ICU, Cardiac surgery ICU, and Transplantation ICU | Tertiary                  | Criteria by the Chinese Ministry of Health in 2001 | √ |   |
| Gao 2011    | low      | Shanxi       | Jul 2008 | Jun 2009 | Surveillance             | ICU                                                                               | Tertiary                  | Criteria by the Chinese Ministry of Health in 2001 |   | √ |
| Gao 2014    | low      | Hubei        | Jan 2012 | Dec 2012 | Surveillance             | General ICU                                                                       | Tertiary                  | Criteria by the Chinese Ministry of Health in 2001 | √ | √ |
| Gao 2015a   | moderate | Heilongjiang | Oct 2014 | Mar 2015 | Prospective cohort study | RICU                                                                              | Tertiary                  | Others                                             | √ | √ |
| Gao 2015b   | low      | Unclear      | Oct 2013 | Sep 2014 | Surveillance             | General ICU                                                                       | Tertiary and Non-tertiary | Criteria by Chinese Thoracic Society in 1999       | √ |   |
| He 2015     | high     | Zhejiang     | Jan 2012 | Jan 2014 | Prospective cohort study | ICU                                                                               | Non-tertiary              | Unclear                                            | √ | √ |
| Hou 2015    | low      | Chongqing    | Jan 2013 | Dec 2013 | Surveillance             | ICU                                                                               | Tertiary                  | Criteria by the Chinese Ministry of Health in 2001 | √ |   |
| Hu 2012     | low      | Hubei        | Jul 2009 | Jun 2010 | Surveillance             | ICU                                                                               | Tertiary                  | Criteria by Chinese Thoracic Society in 1999       |   | √ |
| Huang 2011a | moderate | Sichuan      | Jan 2009 | Dec 2010 | Surveillance             | ICU                                                                               | Tertiary                  | Unclear                                            |   | √ |
| Huang 2011b | moderate | Sichuan      | Jan 2010 | Dec 2010 | Surveillance             | ICU                                                                               | Non-tertiary              | Criteria by the Chinese Ministry of Health in 2001 |   | √ |
| Huang 2012  | moderate | Fujian       | Jul 2008 | Jun 2011 | Prospective cohort study | ICU                                                                               | Tertiary                  | Criteria by the Chinese Ministry of Health in 2001 | √ | √ |
| Huang 2013  | low      | Guangxi      | Jan 2011 | Jun 2012 | Surveillance             | PICU                                                                              | Tertiary                  | Criteria by the Chinese Ministry of Health in 2001 | √ | √ |
| Huang 2014  | low      | Guangxi      | Jan 2010 | Dec 2013 | Surveillance             | ICU                                                                               | Tertiary                  | Others                                             | √ |   |

|             |          |                                                  |          |          |                          |                     |                           |                                                    |   |   |   |
|-------------|----------|--------------------------------------------------|----------|----------|--------------------------|---------------------|---------------------------|----------------------------------------------------|---|---|---|
| Huang 2015a | high     | Jiangsu                                          | Jan 2012 | Dec 2012 | Surveillance             | General ICU         | Tertiary                  | Unclear                                            | √ |   |   |
| Huang 2015b | high     | Henan                                            | Jan 2010 | Dec 2013 | Surveillance             | ICU                 | Tertiary                  | Unclear                                            | √ |   | √ |
| Jia 2011    | low      | Beijing                                          | Jan 2007 | Dec 2009 | Surveillance             | SICU                | Tertiary                  | Criteria by the Chinese Ministry of Health in 2001 |   | √ | √ |
| Jia 2015    | moderate | Xinjiang                                         | Jan 2013 | Dec 2013 | Surveillance             | ICU                 | Tertiary                  | Criteria by the Chinese Ministry of Health in 2001 | √ |   |   |
| Jiang 2012a | low      | Jiangsu                                          | May 2010 | Oct 2011 | Surveillance             | General ICU         | Tertiary                  | Criteria by the Chinese Ministry of Health in 2001 |   | √ |   |
| Jiang 2012b | moderate | Jiangsu                                          | Jan 2011 | Dec 2011 | Surveillance             | ICU                 | Tertiary and Non-tertiary | Criteria by the Chinese Ministry of Health in 2001 |   | √ |   |
| Jiang 2015  | low      | Jiangsu                                          | Jan 2010 | Dec 2012 | Surveillance             | General ICU         | Tertiary                  | Criteria by Chinese Thoracic Society in 1999       | √ | √ | √ |
| Kong 2012   | moderate | Jiangsu                                          | Jan 2010 | Dec 2010 | Surveillance             | ICU                 | Non-tertiary              | Unclear                                            | √ |   |   |
| Lei 2010    | moderate | Jiangxi                                          | Jan 2009 | Dec 2009 | Surveillance             | Neonatal department | Tertiary                  | Criteria by Chinese Thoracic Society in 1999       |   |   | √ |
| Li 2011a    | moderate | Sichuan                                          | Jan 2009 | Dec 2009 | Surveillance             | NICU                | Tertiary                  | Unclear                                            | √ |   |   |
| Li 2011b    | low      | Heilongjiang                                     | Jul 2010 | Dec 2010 | Surveillance             | General ICU         | Tertiary                  | Criteria by the Chinese Ministry of Health in 2001 | √ | √ | √ |
| Li 2012     | moderate | Sichuan                                          | Jan 2009 | Dec 2009 | Surveillance             | General ICU         | Non-tertiary              | Unclear                                            | √ | √ | √ |
| Li 2013a    | low      | Sichuan                                          | Jan 2010 | Jun 2012 | Surveillance             | General ICU         | Tertiary                  | Criteria by Chinese Thoracic Society in 1999       | √ |   | √ |
| Li 2013b    | low      | Hubei                                            | Jan 2011 | Dec 2011 | Surveillance             | ICU                 | Tertiary                  | Criteria by the Chinese Ministry of Health in 2001 |   | √ |   |
| Li 2014a    | low      | Guangxi                                          | Jan 2012 | Dec 2013 | Surveillance             | General ICU         | Tertiary                  | Criteria by the Chinese Ministry of Health in 2001 |   | √ |   |
| Li 2014b    | low      | Guangxi                                          | May 2012 | May 2013 | Surveillance             | General ICU         | Tertiary                  | Criteria by the Chinese Ministry of Health in 2001 |   | √ |   |
| Li 2014c    | low      | Anhui                                            | Jan 2013 | Dec 2013 | Surveillance             | General ICU         | Tertiary                  | Criteria by the Chinese Ministry of Health in 2001 | √ |   | √ |
| Li 2015a    | low      | Sichuan                                          | Jan 2014 | Dec 2014 | Surveillance             | RICU                | Tertiary                  | Criteria by the Chinese Ministry of Health in 2001 | √ |   |   |
| Li 2015b    | low      | Beijing, Shanghai, Chongqing, Zhejiang, Jiangsu, | Oct 2013 | Mar 2014 | Prospective cohort study | ICU                 | Tertiary and Non-tertiary | Others                                             |   | √ |   |

| Study ID  | Quality Score | Province                                                                  | Start Date | End Date | Study Design             | ICU Type                            | Hospital Level | Criteria                                                   | Checkmark 1 | Checkmark 2 |
|-----------|---------------|---------------------------------------------------------------------------|------------|----------|--------------------------|-------------------------------------|----------------|------------------------------------------------------------|-------------|-------------|
|           |               | Henan, Hunan, Guangdong, Shandong, Shanxi, Guizhou, Sichuan, and Liaoning |            |          |                          |                                     |                |                                                            |             |             |
| Li 2015c  | moderate      | Jiangsu                                                                   | Dec 2012   | Sep 2014 | Prospective cohort study | PICU                                | Tertiary       | Criteria by Chinese Critical Care Medicine Society in 2013 | √           | √           |
| Li 2015d  | moderate      | Anhui                                                                     | Jun 2011   | Dec 2012 | Surveillance             | General ICU                         | Tertiary       | Criteria by the Chinese Ministry of Health in 2001         | √           |             |
| Liao 2013 | low           | Guangxi                                                                   | Jan 2010   | Aug 2012 | Surveillance             | Neonatal department                 | Tertiary       | Criteria by the Chinese Ministry of Health in 2001         | √           |             |
| Lin 2011  | moderate      | Henan                                                                     | Nov 2008   | Oct 2009 | Surveillance             | General ICU                         | Tertiary       | Unclear                                                    | √           |             |
| Lin 2014  | moderate      | Henan                                                                     | Jan 2011   | Dec 2011 | Surveillance             | General ICU                         | Tertiary       | Criteria by the Chinese Ministry of Health in 2001         | √           |             |
| Lin 2015  | high          | Guangxi                                                                   | Jan 2013   | Dec 2014 | Prospective cohort study | ICU                                 | Tertiary       | Unclear                                                    | √           | √           |
| Liu 2010  | low           | Inner Mongolia                                                            | Jan 2009   | Dec 2009 | Surveillance             | ICU                                 | Tertiary       | Criteria by Chinese Thoracic Society in 1999               |             | √           |
| Liu 2011  | moderate      | Fujian                                                                    | Apr 2009   | Mar 2010 | Surveillance             | ICU                                 | Tertiary       | Criteria by Chinese Thoracic Society in 1999               | √           | √           |
| Liu 2013a | low           | Jiangsu                                                                   | Jan 2011   | Dec 2011 | Surveillance             | General ICU                         | Tertiary       | Criteria by the Chinese Ministry of Health in 2001         |             | √           |
| Liu 2013b | low           | Shandong                                                                  | Jan 2012   | Dec 2012 | Surveillance             | General ICU                         | Non-tertiary   | Criteria by the Chinese Ministry of Health in 2001         | √           |             |
| Liu 2014  | low           | Hebei                                                                     | Jan 2012   | Dec 2012 | Surveillance             | General ICU, Neurology ICU, and CCU | Tertiary       | Criteria by the Chinese Ministry of Health in 2001         | √           | √           |
| Liu 2015a | low           | Anhui                                                                     | Jan 2013   | Dec 2013 | Surveillance             | ICU                                 | Tertiary       | Criteria by the Chinese Ministry of Health in 2001         | √           | √           |
| Liu 2015b | low           | Inner Mongolia                                                            | Jan 2014   | Dec 2014 | Surveillance             | Unclear                             | Unclear        | Criteria by the Chinese Ministry of Health in 2001         | √           |             |
| Liu 2015c | low           | Shanxi                                                                    | Jul 2013   | Dec 2013 | Surveillance             | ICU                                 | Tertiary       | Criteria by the Chinese                                    | √           |             |

|           |          |           |          |          |                          |                                                                                                                       |                           |                                                    |   |
|-----------|----------|-----------|----------|----------|--------------------------|-----------------------------------------------------------------------------------------------------------------------|---------------------------|----------------------------------------------------|---|
|           |          |           |          |          |                          |                                                                                                                       |                           | Ministry of Health in 2001                         |   |
| Luo 2014  | moderate | Fujian    | Jan 2012 | Dec 2012 | Surveillance             | Neurosurgery ICU                                                                                                      | Tertiary                  | Criteria by the Chinese Ministry of Health in 2001 | √ |
| Ma 2012a  | low      | Shanxi    | Feb 2009 | Nov 2010 | Surveillance             | ICU                                                                                                                   | Tertiary                  | Criteria by the Chinese Ministry of Health in 2001 | √ |
| Ma 2012b  | high     | Jiangsu   | Jan 2011 | Jun 2012 | Surveillance             | ICU                                                                                                                   | Tertiary                  | Unclear                                            | √ |
| Mai 2013  | low      | Guangdong | Jan 2012 | Sep 2012 | Surveillance             | Neonatal department                                                                                                   | Tertiary                  | Criteria by the Chinese Ministry of Health in 2001 | √ |
| Mao 2010  | low      | Sichuan   | Jul 2008 | Jun 2009 | Surveillance             | ICU                                                                                                                   | Tertiary                  | Criteria by Chinese Thoracic Society in 1999       | √ |
|           |          |           |          |          |                          | Medical ICU, SICU, Neurosurgery ICU, Cardiac surgery ICU, CCU, PICU, General ICU, Trauma ICU, and Transplantation ICU |                           |                                                    |   |
| Mao 2012  | low      | Shanghai  | Jan 2009 | Dec 2010 | Surveillance             | CCU, PICU, General ICU, Trauma ICU, and Transplantation ICU                                                           | Tertiary and Non-tertiary | Criteria by the Chinese Ministry of Health in 2001 | √ |
| Mi 2011   | low      | Shanghai  | Jan 2005 | Dec 2009 | Surveillance             | SICU                                                                                                                  | Tertiary                  | Criteria by the Chinese Ministry of Health in 2001 | √ |
| Ming 2012 | low      | Sichuan   | Jan 2011 | Jun 2011 | Surveillance             | ICU                                                                                                                   | Tertiary                  | Criteria by the Chinese Ministry of Health in 2001 | √ |
| Pan 2013a | low      | Guangdong | Jan 2010 | Dec 2012 | Surveillance             | NICU                                                                                                                  | Non-tertiary              | Criteria by Chinese Thoracic Society in 1999       | √ |
| Pan 2013b | low      | Jiangsu   | Jan 2011 | Dec 2012 | Surveillance             | ICU                                                                                                                   | Tertiary                  | Criteria by the Chinese Ministry of Health in 2001 | √ |
| Peng 2013 | moderate | Sichuan   | Feb 2010 | Sep 2012 | Surveillance             | ICU                                                                                                                   | Tertiary                  | Others                                             | √ |
| Pu 2011   | moderate | Sichuan   | Sep 2010 | Feb 2011 | Surveillance             | General ICU                                                                                                           | Tertiary                  | Criteria by the Chinese Ministry of Health in 2001 | √ |
| Qi 2010a  | low      | Zhejiang  | Mar 2008 | Sep 2009 | Surveillance             | EICU                                                                                                                  | Non-tertiary              | Criteria by Chinese Thoracic Society in 1999       | √ |
| Qi 2010b  | moderate | Hebei     | Jun 2008 | Oct 2009 | Prospective cohort study | RICU                                                                                                                  | Tertiary                  | Others                                             | √ |
| Qi 2013   | low      | Anhui     | Jan 2011 | Dec 2011 | Surveillance             | General ICU                                                                                                           | Tertiary                  | Criteria by the Chinese Ministry of Health in 2001 | √ |
| Qian 2015 | moderate | Anhui     | Jan 2011 | Dec 2011 | Surveillance             | General ICU                                                                                                           | Tertiary                  | Unclear                                            | √ |
| Qu 2011   | low      | Henan     | Dec 2009 | Nov 2010 | Surveillance             | Neurosurgery                                                                                                          | Tertiary                  | Criteria by the Chinese                            | √ |

| Author     | Quality  | Location                                                                             | Start    | End      | Study Design             | ICU Type    | Level        | Criteria                                                                                                   | Checkmark |
|------------|----------|--------------------------------------------------------------------------------------|----------|----------|--------------------------|-------------|--------------|------------------------------------------------------------------------------------------------------------|-----------|
| Qu 2015    | moderate | Beijing                                                                              | Sep 2010 | Aug 2012 | Prospective cohort study | PICU        | Tertiary     | emergency room<br>Ministry of Health in 2001<br>Criteria by Chinese Critical Care Medicine Society in 2013 | √         |
| Ren 2012   | low      | Beijing                                                                              | Feb 2010 | Sep 2011 | Surveillance             | NICU        | Tertiary     | Criteria by the Chinese Ministry of Health in 2001                                                         | √         |
| Ren 2015   | low      | Beijing, Shandong, Shanxi, Chongqing, Zhejiang, Jiangsu, Henan, Hunan, and Guangdong | Oct 2013 | Sep 2014 | Surveillance             | NICU        | Tertiary     | Criteria by the Chinese Ministry of Health in 2001                                                         | √         |
| Shen 2010  | low      | Jiangsu                                                                              | Nov 2008 | Apr 2009 | Surveillance             | General ICU | Tertiary     | Criteria by the Chinese Ministry of Health in 2001                                                         | √         |
| Sheng 2015 | low      | Anhui                                                                                | Jan 2013 | Dec 2013 | Surveillance             | General ICU | Tertiary     | Criteria by the Chinese Ministry of Health in 2001                                                         | √         |
| Shu 2015a  | moderate | Anhui                                                                                | Apr 2012 | Apr 2013 | Prospective cohort study | Unclear     | Tertiary     | Others                                                                                                     | √         |
| Shu 2015b  | low      | Anhui                                                                                | Oct 2012 | Sep 2013 | Prospective cohort study | NICU        | Tertiary     | Others                                                                                                     | √         |
| Situ 2015  | moderate | Guangdong                                                                            | Jan 2011 | Dec 2013 | Surveillance             | NICU        | Tertiary     | Criteria by Chinese Thoracic Society in 1999                                                               | √         |
| Song 2013  | low      | Jiangsu                                                                              | Sep 2010 | Sep 2011 | Surveillance             | ICU         | Tertiary     | Criteria by the Chinese Ministry of Health in 2001                                                         | √         |
| Song 2015  | low      | Hebei                                                                                | Jan 2012 | Dec 2012 | Surveillance             | ICU         | Tertiary     | Criteria by the Chinese Ministry of Health in 2001                                                         | √         |
| Sun 2015   | low      | Sichuan                                                                              | Apr 2013 | Jul 2013 | Surveillance             | ICU         | Tertiary     | Others                                                                                                     | √         |
| Tang 2012a | moderate | Sichuan                                                                              | May 2011 | Oct 2011 | Surveillance             | ICU         | Non-tertiary | Unclear                                                                                                    | √         |
| Tang 2012b | low      | Jiangxi                                                                              | Jun 2006 | May 2007 | Surveillance             | ICU         | Tertiary     | Criteria by the Chinese Ministry of Health in 2001                                                         | √         |
| Tang 2013  | low      | Jiangsu                                                                              | Jan 2010 | Dec 2011 | Surveillance             | NICU        | Tertiary     | Criteria by the Chinese Ministry of Health in 2001                                                         | √         |
| Tang 2015  | moderate | Jiangsu                                                                              | May 2014 | Sep 2014 | Surveillance             | ICU         | Non-tertiary | Unclear                                                                                                    | √         |
| Wang 2010a | high     | Beijing                                                                              | Oct 2009 | Dec 2009 | Prospective              | Unclear     | Tertiary     | Unclear                                                                                                    | √         |



| Author     | Quality  | Location  | Start    | End      | Study Design             | ICU Type               | Level        | Criteria                                           | Checkmark | Checkmark |
|------------|----------|-----------|----------|----------|--------------------------|------------------------|--------------|----------------------------------------------------|-----------|-----------|
|            |          |           |          |          | cohort study             |                        |              |                                                    |           |           |
| Wang 2010b | moderate | Guangdong | Dec 2006 | Oct 2007 | Surveillance             | General ICU            | Tertiary     | Criteria by Chinese Thoracic Society in 1999       |           | √         |
| Wang 2010c | moderate | Shanghai  | Jul 2006 | Jun 2009 | Surveillance             | ICU                    | Tertiary     | Criteria by Chinese Thoracic Society in 1999       |           | √         |
| Wang 2011a | moderate | Xinjiang  | Jan 2009 | Dec 2009 | Surveillance             | SICU                   | Tertiary     | Criteria by the Chinese Ministry of Health in 2001 | √         |           |
| Wang 2011b | moderate | Shaanxi   | Sep 2010 | Dec 2010 | Surveillance             | Emergency room and ICU | Tertiary     | Criteria by Chinese Thoracic Society in 1999       | √         | √         |
| Wang 2011c | moderate | Hebei     | May 2010 | Mar 2011 | Prospective cohort study | RICU                   | Tertiary     | Criteria by the Chinese Ministry of Health in 2001 |           | √         |
| Wang 2012  | moderate | Henan     | Jan 2009 | Dec 2010 | Surveillance             | Cardiac surgical ICU   | Tertiary     | Criteria by Chinese Thoracic Society in 1999       |           | √         |
| Wang 2013a | low      | Jiangsu   | Jan 2012 | Dec 2012 | Surveillance             | NICU                   | Non-tertiary | Criteria by the Chinese Ministry of Health in 2001 | √         |           |
| Wang 2013b | moderate | Unclear   | Jan 2011 | Dec 2011 | Surveillance             | ICU                    | Tertiary     | Criteria by the Chinese Ministry of Health in 2001 |           | √         |
| Wang 2013c | moderate | Shandong  | Oct 2009 | Jan 2013 | Surveillance             | ICU                    | Non-tertiary | Criteria by Chinese Thoracic Society in 1999       |           | √         |
| Wang 2013d | moderate | Henan     | Jan 2012 | Dec 2012 | Surveillance             | General ICU            | Tertiary     | Criteria by the Chinese Ministry of Health in 2001 |           | √         |
| Wang 2014a | moderate | Henan     | Jul 2011 | Jun 2013 | Surveillance             | General ICU            | Tertiary     | Criteria by Chinese Thoracic Society in 1999       | √         | √         |
| Wang 2014b | moderate | Jiangsu   | Jan 2012 | Dec 2012 | Surveillance             | ICU                    | Tertiary     | Criteria by the Chinese Ministry of Health in 2001 |           | √         |
| Wang 2014c | low      | Zhejiang  | Jan 2011 | Dec 2012 | Surveillance             | Neonatal department    | Tertiary     | Criteria by the Chinese Ministry of Health in 2001 | √         | √         |
| Wang 2015a | moderate | Zhejiang  | Jan 2012 | Sep 2013 | Surveillance             | General ICU            | Tertiary     | Criteria by the Chinese Ministry of Health in 2001 | √         |           |
| Wang 2015b | low      | Zhejiang  | Feb 2012 | Feb 2013 | Surveillance             | ICU                    | Tertiary     | Criteria by the Chinese Ministry of Health in 2001 |           | √         |
| Wang 2015c | low      | Hubei     | Mar 2012 | Mar 2013 | Surveillance             | NICU                   | Tertiary     | Criteria by the Chinese Ministry of Health in 2001 | √         |           |
| Wang 2015d | low      | Xinjiang  | Jan 2011 | Dec 2013 | Surveillance             | NICU                   | Tertiary     | Others                                             | √         | √         |
| Wei 2010   | moderate | Guangdong | Jun 2008 | Nov 2008 | Surveillance             | NICU                   | Tertiary     | Criteria by the Chinese Ministry of Health in 2001 |           | √         |

|            |          |           |          |          |                          |                     |              |                                                    |   |   |
|------------|----------|-----------|----------|----------|--------------------------|---------------------|--------------|----------------------------------------------------|---|---|
| Wei 2012   | moderate | Xinjiang  | Mar 2011 | Aug 2011 | Surveillance             | ICU                 | Tertiary     | Criteria by the Chinese Ministry of Health in 2001 | √ |   |
| Wei 2013   | moderate | Xinjiang  | Mar 2012 | Aug 2012 | Surveillance             | ICU                 | Tertiary     | Criteria by the Chinese Ministry of Health in 2001 | √ |   |
| Wen 2013   | moderate | Anhui     | Jun 2010 | Jun 2011 | Prospective cohort study | ICU                 | Non-tertiary | Criteria by Chinese Thoracic Society in 1999       |   | √ |
| Wu 2012    | low      | Guangdong | Jan 2010 | Sep 2010 | Surveillance             | NICU                | Non-tertiary | Criteria by the Chinese Ministry of Health in 2001 | √ | √ |
| Wu 2013    | low      | Zhejiang  | Jan 2009 | Dec 2012 | Surveillance             | ICU                 | Tertiary     | Criteria by Chinese Thoracic Society in 1999       | √ |   |
| Wu 2015    | low      | Hebei     | Sep 2013 | Aug 2014 | Surveillance             | General ICU         | Tertiary     | Criteria by the Chinese Ministry of Health in 2001 | √ |   |
| Xiang 2014 | moderate | Sichuan   | Jan 2012 | Dec 2012 | Surveillance             | ICU                 | Tertiary     | Criteria by the Chinese Ministry of Health in 2001 |   | √ |
| Xie 2011   | high     | Jiangsu   | Nov 2009 | Feb 2010 | Surveillance             | ICU                 | Unclear      | Unclear                                            |   | √ |
| Xie 2014   | moderate | Hubei     | Jan 2007 | Dec 2010 | Surveillance             | ICU                 | Tertiary     | Unclear                                            | √ | √ |
| Xing 2012  | low      | Anhui     | Apr 2010 | Sep 2010 | Surveillance             | ICU                 | Non-tertiary | Criteria by the Chinese Ministry of Health in 2001 | √ |   |
| Xing 2013  | low      | Anhui     | Feb 2012 | Jul 2012 | Surveillance             | NICU                | Non-tertiary | Criteria by Chinese Thoracic Society in 1999       | √ | √ |
| Xu 2010a   | low      | Hebei     | Jan 2006 | Dec 2008 | Surveillance             | ICU                 | Tertiary     | Criteria by Chinese Thoracic Society in 1999       |   | √ |
| Xu 2010b   | low      | Jiangxi   | Feb 2009 | Jan 2010 | Surveillance             | Neonatal department | Tertiary     | Criteria by the Chinese Ministry of Health in 2001 |   | √ |
| Xu 2014a   | moderate | Xinjiang  | Jan 2012 | Dec 2012 | Surveillance             | ICU                 | Non-tertiary | Criteria by the Chinese Ministry of Health in 2001 | √ |   |
| Xu 2014b   | moderate | Hubei     | Jan 2011 | Dec 2012 | Surveillance             | PICU                | Tertiary     | Others                                             |   | √ |
| Xue 2014   | moderate | Hubei     | Oct 2010 | Sep 2012 | Surveillance             | General ICU         | Tertiary     | Criteria by the Chinese Ministry of Health in 2001 | √ |   |
| Xue 2015   | moderate | Shanxi    | Jan 2009 | Dec 2012 | Prospective cohort study | ICU                 | Non-tertiary | Criteria by Chinese Thoracic Society in 1999       |   | √ |
| Yan 2014   | moderate | Unclear   | Jan 2011 | Dec 2012 | Surveillance             | ICU                 | Unclear      | Criteria by the Chinese Ministry of Health in 2001 |   | √ |
| Yang 2012  | low      | Zhejiang  | Jan 2010 | Dec 2010 | Surveillance             | ICU                 | Tertiary     | Criteria by Chinese Thoracic Society in 1999       | √ | √ |
| Yang 2013  | low      | Jiangsu   | Jan 2011 | Dec 2011 | Surveillance             | General ICU         | Non-tertiary | Criteria by the Chinese                            | √ |   |

|            |          |          |          |          |                          |             |              |                                                            |   |   |
|------------|----------|----------|----------|----------|--------------------------|-------------|--------------|------------------------------------------------------------|---|---|
|            |          |          |          |          |                          |             |              | Ministry of Health in 2001                                 |   |   |
| Yang 2014a | moderate | Beijing  | Jun 2010 | Dec 2010 | Surveillance             | ICU         | Tertiary     | Criteria by Chinese Thoracic Society in 1999               |   | √ |
| Yang 2014b | high     | Gansu    | Jan 2013 | Dec 2013 | Prospective cohort study | ICU         | Tertiary     | Unclear                                                    |   | √ |
| Yang 2014c | moderate | Beijing  | Jun 2007 | May 2010 | Prospective cohort study | ICU         | Tertiary     | Others                                                     | √ | √ |
| Yang 2014d | low      | Jiangxi  | Jan 2012 | Aug 2013 | Surveillance             | General ICU | Tertiary     | Criteria by the Chinese Ministry of Health in 2001         | √ |   |
| Yang 2015a | moderate | Hebei    | Jan 2012 | Dec 2013 | Surveillance             | ICU         | Tertiary     | Criteria by the Chinese Ministry of Health in 2001         | √ |   |
| Yang 2015b | moderate | Jiangsu  | Jun 2013 | May 2014 | Prospective cohort study | ICU         | Tertiary     | Criteria by Chinese Critical Care Medicine Society in 2013 | √ | √ |
| Yao 2015   | moderate | Hebei    | Jan 2014 | Dec 2014 | Surveillance             | ICU         | Tertiary     | Criteria by the Chinese Ministry of Health in 2001         | √ |   |
| Ye 2014    | moderate | Zhejiang | Jan 2010 | Sep 2013 | Surveillance             | ICU         | Tertiary     | Criteria by Chinese Thoracic Society in 1999               | √ | √ |
| Ying 2011  | low      | Shandong | Jan 2008 | Dec 2010 | Surveillance             | NICU        | Tertiary     | Criteria by the Chinese Ministry of Health in 2001         |   | √ |
| Ying 2013  | moderate | Shandong | Jan 2008 | Dec 2008 | Surveillance             | NICU        | Tertiary     | Criteria by the Chinese Ministry of Health in 2001         |   | √ |
| You 2012   | moderate | Jiangxi  | Sep 2009 | Mar 2011 | Surveillance             | ICU         | Non-tertiary | Criteria by Chinese Thoracic Society in 1999               |   | √ |
| Yu 2011a   | low      | Henan    | May 2008 | Jan 2010 | Surveillance             | RICU        | Tertiary     | Criteria by Chinese Thoracic Society in 1999               |   | √ |
| Yu 2011b   | low      | Zhejiang | Jan 2010 | Dec 2010 | Surveillance             | ICU         | Tertiary     | Criteria by the Chinese Ministry of Health in 2001         |   | √ |
| Yu 2012a   | low      | Shanghai | Jan 2008 | Dec 2011 | Surveillance             | ICU         | Tertiary     | Criteria by Chinese Thoracic Society in 1999               |   | √ |
| Yu 2012b   | moderate | Anhui    | Jan 2009 | Dec 2009 | Surveillance             | ICU         | Tertiary     | Criteria by the Chinese Ministry of Health in 2001         | √ |   |
| Yu 2014    | high     | Jiangxi  | Apr 2010 | Apr 2012 | Surveillance             | ICU         | Non-tertiary | Unclear                                                    | √ | √ |
| Yu 2015a   | moderate | Jiangxi  | Aug 2012 | Jul 2013 | Surveillance             | ICU         | Tertiary     | Criteria by the Chinese Ministry of Health in 2001         | √ | √ |
| Yu 2015b   | low      | Shanghai | Jun 2009 | Jun 2012 | Prospective              | ICU         | Tertiary     | Criteria by Chinese                                        | √ | √ |

| Author (Year) | Severity | Province  | Start    | End      | Study Design             | ICU Type                                                   | Level                     | Criteria                                           | ✓ | ✓ | ✓ |
|---------------|----------|-----------|----------|----------|--------------------------|------------------------------------------------------------|---------------------------|----------------------------------------------------|---|---|---|
|               |          |           |          |          | cohort study             |                                                            |                           | Thoracic Society in 1999                           |   |   |   |
| Yu 2015c      | moderate | Jiangsu   | Jan 2011 | Dec 2014 | Surveillance             | General ICU and SICU                                       | Tertiary                  | Criteria by Chinese Thoracic Society in 1999       | √ | √ | √ |
| Yuan 2011     | low      | Beijing   | Jan 2008 | Dec 2010 | Surveillance             | SICU                                                       | Tertiary                  | Criteria by the Chinese Ministry of Health in 2001 | √ |   |   |
| Yue 2015      | moderate | Shandong  | Jan 2010 | Aug 2012 | Prospective cohort study | ICU                                                        | Tertiary and Non-tertiary | Unclear                                            | √ |   |   |
| Zeng 2014     | low      | Sichuan   | Apr 2013 | Jul 2013 | Surveillance             | ICU                                                        | Tertiary                  | Others                                             |   |   | √ |
| Zhang 2010a   | low      | Shanghai  | Sep 2004 | Dec 2009 | Surveillance             | SICU, Cardiac surgery ICU, CCU, Medical ICU, EICU and RICU | Tertiary                  | Criteria by the Chinese Ministry of Health in 2001 | √ |   | √ |
| Zhang 2010b   | high     | Guangxi   | Jan 2009 | Dec 2009 | Surveillance             | Neonatal department                                        | Tertiary                  | Unclear                                            |   |   | √ |
| Zhang 2011a   | low      | Zhejiang  | Feb 2009 | Jan 2010 | Surveillance             | ICU                                                        | Tertiary                  | Criteria by the Chinese Ministry of Health in 2001 |   | √ |   |
| Zhang 2011b   | moderate | Shanxi    | Nov 2008 | Nov 2009 | Surveillance             | ICU                                                        | Tertiary                  | Criteria by the Chinese Ministry of Health in 2001 | √ |   | √ |
| Zhang 2011c   | low      | Chongqing | Jan 2010 | Dec 2010 | Surveillance             | ICU                                                        | Tertiary                  | Criteria by the Chinese Ministry of Health in 2001 | √ |   |   |
| Zhang 2011d   | low      | Chongqing | Jan 2010 | Dec 2010 | Surveillance             | RICU                                                       | Tertiary                  | Criteria by the Chinese Ministry of Health in 2001 | √ |   |   |
| Zhang 2011e   | low      | Guangxi   | Jan 2009 | Dec 2010 | Surveillance             | ICU                                                        | Tertiary                  | Criteria by the Chinese Ministry of Health in 2001 |   | √ |   |
| Zhang 2011f   | moderate | Fujian    | Apr 2008 | Dec 2008 | Surveillance             | SICU                                                       | Tertiary                  | Criteria by Chinese Thoracic Society in 1999       | √ |   |   |
| Zhang 2012a   | moderate | Shandong  | Jul 2010 | Mar 2012 | Prospective cohort study | ICU                                                        | Tertiary                  | Criteria by Chinese Thoracic Society in 1999       |   |   | √ |
| Zhang 2012b   | moderate | Fujian    | Jul 2010 | Jun 2011 | Surveillance             | ICU                                                        | Tertiary                  | Criteria by the Chinese Ministry of Health in 2001 | √ |   |   |
| Zhang 2013a   | moderate | Jiangxi   | Jan 2010 | Jan 2013 | Surveillance             | ICU                                                        | Tertiary                  | Criteria by Chinese Thoracic Society in 1999       |   |   | √ |
| Zhang 2013b   | low      | Shaanxi   | Jul 2011 | Jun 2012 | Surveillance             | ICU                                                        | Non-tertiary              | Criteria by the Chinese Ministry of Health in 2001 | √ |   |   |
| Zhang 2014a   | low      | Henan     | Jan 2012 | Dec 2012 | Surveillance             | ICU                                                        | Tertiary                  | Criteria by the Chinese Ministry of Health in 2001 | √ |   |   |
| Zhang 2014b   | moderate | Henan     | Jan 2014 | Jun 2014 | Surveillance             | NICU                                                       | Tertiary                  | Criteria by the Chinese                            | √ |   |   |

|             |          |           |          |          |                          |                       |                           |                                                    |   |   |
|-------------|----------|-----------|----------|----------|--------------------------|-----------------------|---------------------------|----------------------------------------------------|---|---|
|             |          |           |          |          |                          |                       |                           | Ministry of Health in 2001                         |   |   |
| Zhang 2014c | low      | Jiangsu   | Jan 2011 | Dec 2011 | Surveillance             | NICU                  | Tertiary                  | Criteria by the Chinese Ministry of Health in 2001 | √ |   |
| Zhang 2015a | moderate | Hebei     | Jan 2013 | Jan 2014 | Prospective cohort study | ICU                   | Tertiary                  | Criteria by Chinese Thoracic Society in 1999       |   | √ |
| Zhang 2015b | high     | Xinjiang  | Jan 2010 | Dec 2014 | Surveillance             | ICU                   | Tertiary                  | Unclear                                            | √ |   |
| Zhang 2015c | moderate | Chognqing | Jan 2012 | Sep 2012 | Prospective cohort study | PICU                  | Tertiary                  | Criteria by Chinese Thoracic Society in 1999       | √ | √ |
| Zhao 2012a  | moderate | Guangdong | Jan 2009 | Dec 2011 | Surveillance             | Unclear               | Tertiary                  | Others                                             |   | √ |
| Zhao 2012b  | moderate | Hebei     | Jan 2012 | Jul 2012 | Surveillance             | ICU                   | Tertiary                  | Criteria by the Chinese Ministry of Health in 2001 |   | √ |
| Zhao 2013   | low      | Hubei     | Jan 2012 | Dec 2012 | Surveillance             | ICU                   | Tertiary                  | Criteria by the Chinese Ministry of Health in 2001 | √ |   |
| Zhao 2014a  | low      | Guangdong | Jan 2012 | Jan 2012 | Surveillance             | ICU                   | Tertiary                  | Others                                             |   | √ |
| Zhao 2014b  | moderate | Guangdong | Jan 2012 | Dec 2012 | Surveillance             | Pediatric cardiac ICU | Tertiary                  | Unclear                                            | √ |   |
| Zhao 2015   | moderate | Hebei     | Jan 2013 | Dec 2013 | Prospective cohort study | ICU                   | Tertiary                  | Criteria by the Chinese Ministry of Health in 2001 | √ |   |
| Zhong 2013  | high     | Sichuan   | Jan 2011 | Oct 2011 | Prospective cohort study | ICU                   | Non-tertiary              | Unclear                                            |   | √ |
| Zhou 2013a  | moderate | Jiangsu   | Jan 2011 | Dec 2012 | Surveillance             | ICU                   | Tertiary and Non-tertiary | Criteria by the Chinese Ministry of Health in 2001 |   | √ |
| Zhou 2013b  | high     | Chongqing | Jan 2011 | Dec 2011 | Surveillance             | ICU                   | Non-tertiary              | Unclear                                            | √ |   |
| Zhou 2013c  | moderate | Guizhou   | Jan 2011 | Dec 2012 | Surveillance             | ICU                   | Tertiary                  | Criteria by the Chinese Ministry of Health in 2001 |   | √ |
| Zhu 2010    | moderate | Ningxia   | Apr 2008 | Mar 2009 | Surveillance             | Neurology ICU         | Tertiary                  | Criteria by the Chinese Ministry of Health in 2001 | √ |   |
| Zhu 2014a   | moderate | Tianjin   | Jan 2012 | Dec 2012 | Surveillance             | ICU                   | Tertiary                  | Criteria by the Chinese Ministry of Health in 2001 | √ |   |
| Zhu 2014b   | moderate | Xinjiang  | Jan 2010 | Dec 2012 | Surveillance             | ICU                   | Tertiary                  | Unclear                                            | √ | √ |
| Zong 2013   | low      | Jiangsu   | Jul 2010 | Jun 2011 | Surveillance             | ICU                   | Tertiary                  | Criteria by the Chinese Ministry of Health in 2001 |   | √ |
| Zou 2013    | moderate | Hubei     | Jan 2011 | Dec 2012 | Surveillance             | ICU                   | Tertiary                  | Criteria by the Chinese Ministry of Health in 2001 | √ |   |
| Zou 2015    | low      | Guangdong | May 2014 | May 2015 | Surveillance             | PICU                  | Tertiary                  | Criteria by the Chinese Ministry of Health in 2001 | √ |   |

|          |     |           |          |          |              |      |          |                                                 |   |
|----------|-----|-----------|----------|----------|--------------|------|----------|-------------------------------------------------|---|
| Zuo 2015 | low | Guangdong | Jan 2011 | Dec 2013 | Surveillance | NICU | Tertiary | Criteria by Chinese<br>Thoracic Society in 1999 | √ |
|----------|-----|-----------|----------|----------|--------------|------|----------|-------------------------------------------------|---|

---

<sup>a</sup>ICU=intensive care unit, NICU=neonatal intensive care unit, PICU=pediatric intensive care unit, RICU=respiratory intensive care unit, SICU= surgery intensive care unit, CCU=cardiac care unit, EICU=emergency intensive care unit.

<sup>b</sup>Others refer to a specified diagnostic criteria rather than the one proposed by Chinese Thoracic Society, Chinese Critical Care Medicine Society, or the Chinese Ministry of Health, which was reported in a small number of studies.

**Table S4.** The results of subgroup analyses by Chinese provinces and years of study

| Subgroups            |                | Studies | Sample size | Estimate (%) <sup>a</sup> | 95%CI (%) | <i>I</i> <sup>2</sup> (%) | <i>p</i> value <sup>b</sup> |
|----------------------|----------------|---------|-------------|---------------------------|-----------|---------------------------|-----------------------------|
| Overall <sup>c</sup> |                | 93      | 71936       | 23.8                      | 20.6-27.2 | 98.9                      | -                           |
| Province             | Anhui          | 7       | 1611        | 22.5                      | 9.8-38.5  | 97.5                      | <0.001                      |
|                      | Beijing        | 5       | 370         | 28.1                      | 23.6-32.7 | 0.0                       |                             |
|                      | Chongqing      | 1       | 30          | 70.0                      | 52.7-84.8 | -                         |                             |
|                      | Fujian         | 3       | 1201        | 7.5                       | 5.9-9.4   | 22.4                      |                             |
|                      | Gansu          | 1       | 54          | 29.6                      | 18.3-42.4 | -                         |                             |
|                      | Guangdong      | 8       | 3931        | 16.9                      | 10.9-24.0 | 96.0                      |                             |
|                      | Guangxi        | 3       | 340         | 31.2                      | 12.3-54.1 | 91.6                      |                             |
|                      | Guizhou        | 1       | 319         | 25.7                      | 21.1-30.6 | -                         |                             |
|                      | Hebei          | 6       | 1206        | 27.8                      | 13.4-45.0 | 96.6                      |                             |
|                      | Heilongjiang   | 2       | 82          | 20.7                      | 12.7-30.1 | 0.0                       |                             |
|                      | Henan          | 4       | 2083        | 17.7                      | 11.3-25.2 | 92.1                      |                             |
|                      | Hubei          | 4       | 4760        | 24.7                      | 14.4-36.8 | 96.1                      |                             |
|                      | Jiangsu        | 8       | 8464        | 18.8                      | 10.4-28.9 | 98.9                      |                             |
|                      | Jiangxi        | 10      | 11185       | 29.5                      | 17.0-43.7 | 97.3                      |                             |
|                      | Inner Mongolia | 1       | 213         | 32.9                      | 26.7-39.3 | -                         |                             |
|                      | Qinghai        | 1       | 146         | 14.4                      | 9.2-20.5  | -                         |                             |
|                      | Shaanxi        | 1       | 96          | 16.7                      | 9.9-24.7  | -                         |                             |
|                      | Shandong       | 3       | 1128        | 27.5                      | 8.8-51.7  | 97.8                      |                             |
|                      | Shanghai       | 4       | 29715       | 17.8                      | 5.4-35.2  | 99.2                      |                             |
|                      | Shanxi         | 4       | 559         | 39.8                      | 30.5-49.5 | 81.2                      |                             |
|                      | Sichuan        | 7       | 2227        | 15.0                      | 8.3-23.4  | 95.4                      |                             |
|                      | Xinjiang       | 2       | 819         | 34.5                      | 28.4-40.9 | 69.1                      |                             |
|                      | Zhejiang       | 7       | 1277        | 30.3                      | 22.1-39.3 | 90.2                      |                             |
| Year of study        | 2006           | 1       | 105         | 49.5                      | 40.0-59.0 | -                         | <0.001                      |
|                      | 2007           | 5       | 29436       | 33.8                      | 7.8-67.0  | 99.6                      |                             |
|                      | 2008           | 7       | 5213        | 29.2                      | 21.1-38.1 | 94.7                      |                             |
|                      | 2009           | 19      | 6672        | 22.2                      | 17.7-27.0 | 94.0                      |                             |
|                      | 2010           | 22      | 12805       | 21.4                      | 15.7-27.7 | 98.2                      |                             |
|                      | 2011           | 22      | 7170        | 24.6                      | 18.0-32.0 | 97.6                      |                             |
|                      | 2012           | 17      | 4848        | 16.0                      | 11.0-21.8 | 96.0                      |                             |
|                      | 2013           | 12      | 1734        | 19.3                      | 14.0-25.2 | 87.7                      |                             |
|                      | 2014           | 1       | 56          | 19.6                      | 10.4-31.0 | -                         |                             |

CI, confidence interval.

<sup>a</sup>Pooled estimates were calculated by a random-effects model.

<sup>b</sup>The Q test for heterogeneity was used to compare the incidence across subgroups.

<sup>c</sup> Studies that reported the cumulative incidence of VAP

**Table S5.** Summary of diagnostic requirements for the three published sets of criteria in mainland China

| Published criteria                             | Clinical and radiography criteria                                                                                                                                                                                                                                                                                                                                                                                                                                                                                                                                                          | Microbiology criteria                                                                                                                                                                                                                                                                                                                                                                                                                                                                                                                                                                                                                                                                                                                                                                       |
|------------------------------------------------|--------------------------------------------------------------------------------------------------------------------------------------------------------------------------------------------------------------------------------------------------------------------------------------------------------------------------------------------------------------------------------------------------------------------------------------------------------------------------------------------------------------------------------------------------------------------------------------------|---------------------------------------------------------------------------------------------------------------------------------------------------------------------------------------------------------------------------------------------------------------------------------------------------------------------------------------------------------------------------------------------------------------------------------------------------------------------------------------------------------------------------------------------------------------------------------------------------------------------------------------------------------------------------------------------------------------------------------------------------------------------------------------------|
| the Chinese Ministry of Health in 2001         | <ul style="list-style-type: none"> <li>• Cough, sputum or moist rales</li> <li>• At least one criterion:               <ul style="list-style-type: none"> <li>– Fever</li> <li>– Elevated white blood cell count and/or neutrophil percentage</li> <li>– Inflammatory infiltrates on chest X-ray</li> </ul> </li> </ul>                                                                                                                                                                                                                                                                    | <ul style="list-style-type: none"> <li>• At least one criterion:               <ul style="list-style-type: none"> <li>– The same pathogens detected in two consecutive sputum samples</li> <li>– Quantitative sputum culture <math>\geq 10^6</math> cfu/ml</li> <li>– Positive growth in blood culture or culture of pleural fluid</li> <li>– Lower respiratory tract secretions collected via bronchoscopy be cultured for microorganisms <math>\geq 10^5</math> cfu/ml, BAL samples be cultured for microorganisms <math>\geq 10^4</math> cfu/ml, or pathogens detected in PSB or PBAL samples</li> <li>– Uncommon pathogens detected in sputum or lower respiratory tract samples</li> <li>– Abnormal immunology tests or histopathological evidence of pneumonia</li> </ul> </li> </ul> |
| Chinese Thoracic Society in 1999               | <ul style="list-style-type: none"> <li>• At least one criterion:               <ul style="list-style-type: none"> <li>– The advent of cough, sputum or existing respiratory symptoms, and purulent sputum</li> <li>– Fever</li> <li>– Pulmonary consolidation syndrome and/or moist rales</li> <li>– White blood cell count <math>&gt; 10 \times 10^9/L</math> or <math>&lt; 4 \times 10^9/L</math>, with or without an accompanying shift to the left</li> </ul> </li> <li>• Patchy infiltrate shadows or interstitial change on chest X-ray, with or without pleural effusion</li> </ul> | —                                                                                                                                                                                                                                                                                                                                                                                                                                                                                                                                                                                                                                                                                                                                                                                           |
| Chinese Critical Care Medicine Society in 2013 | <ul style="list-style-type: none"> <li>• New or progressive infiltrates on chest X-ray</li> <li>• At least two criteria:               <ul style="list-style-type: none"> <li>– Temperature <math>&gt; 38^\circ\text{C}</math> or <math>&lt; 36^\circ\text{C}</math></li> <li>– White blood cell count <math>&gt; 10 \times 10^9/L</math> or <math>&lt; 4 \times 10^9/L</math></li> <li>– Purulent secretions</li> </ul> </li> </ul>                                                                                                                                                       | —                                                                                                                                                                                                                                                                                                                                                                                                                                                                                                                                                                                                                                                                                                                                                                                           |



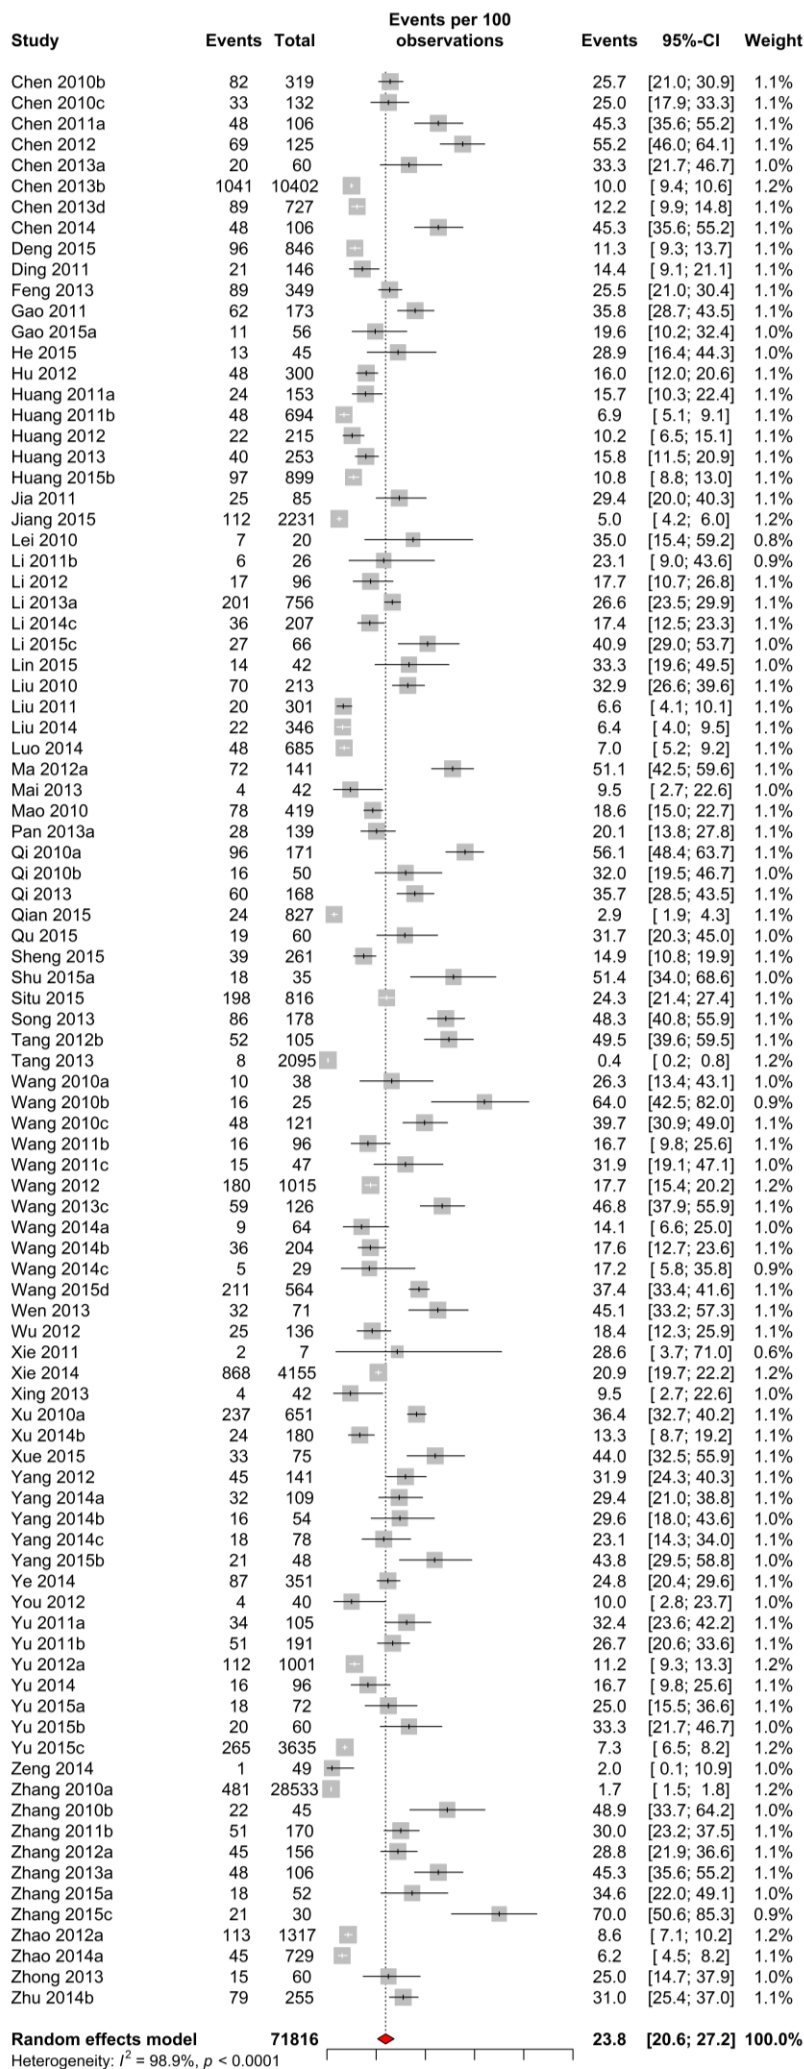

**Figure S1.** Forest plot of the cumulative incidence of ventilator-associated pneumonia (VAP) using a random-effects model.

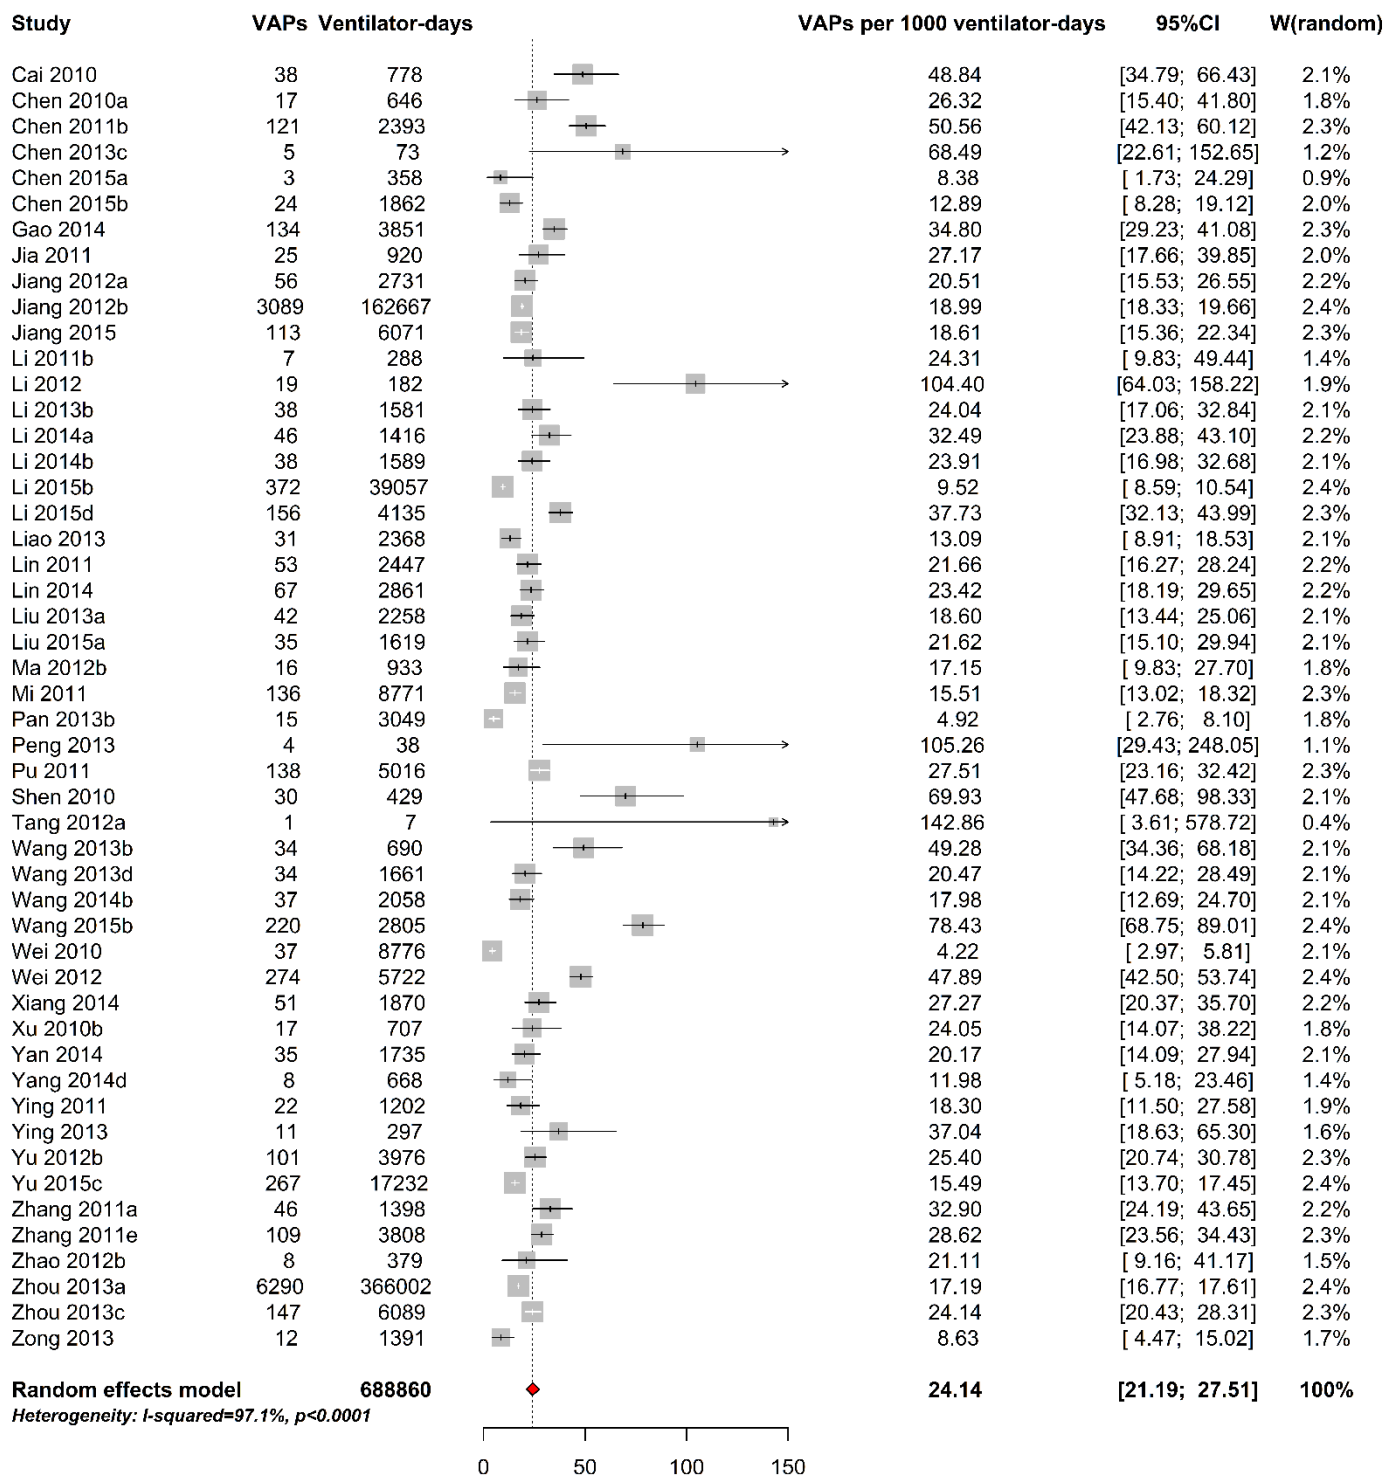

**Figure S2.** Forest plot of the incidence density (reported as episodes per 1000 ventilator-days) of ventilator-associated pneumonia (VAP) using a random-effects model.

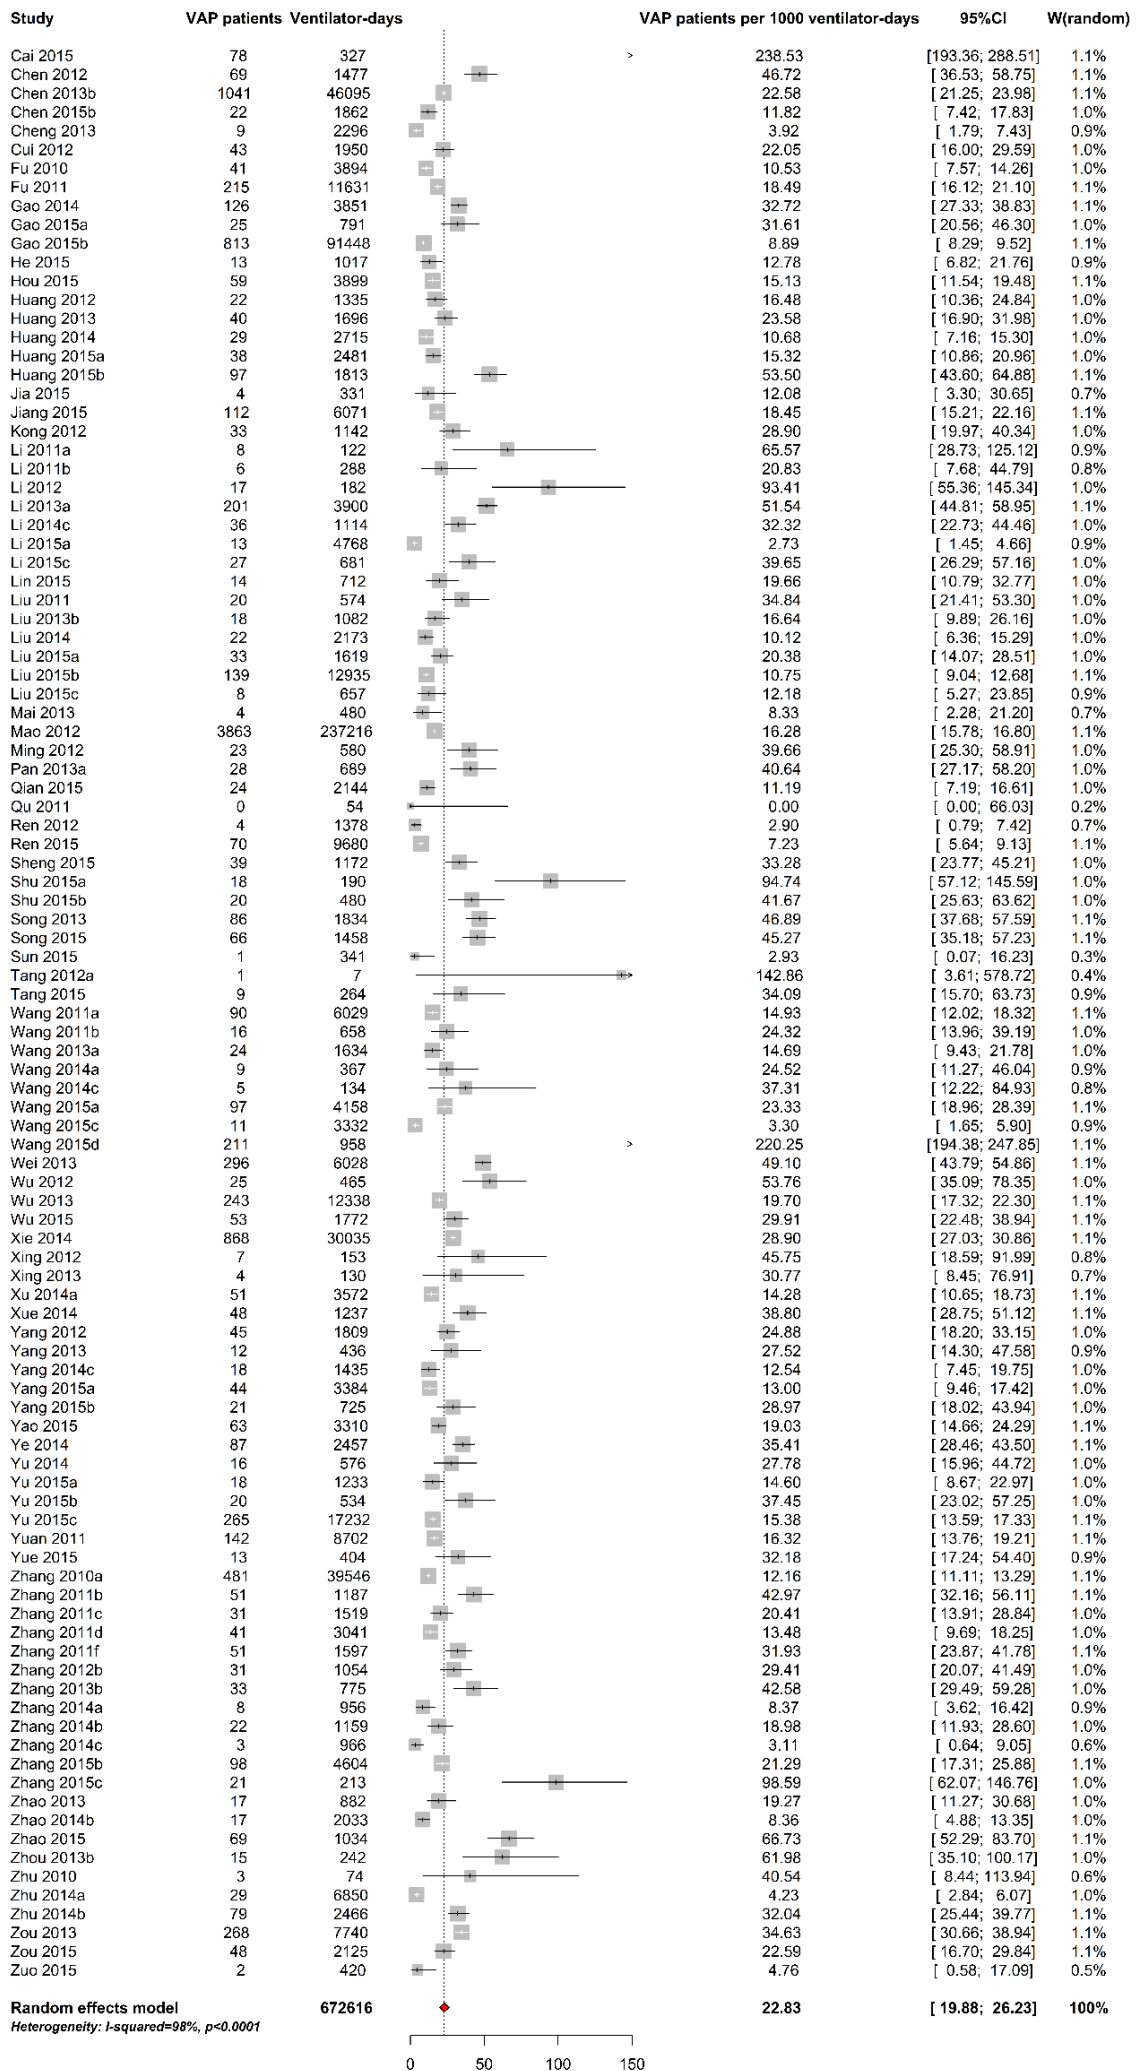

**Figure S3.** Forest plot of the incidence density (reported as patients per 1000 ventilator-days) of ventilator-associated pneumonia (VAP) using a random-effects model.
