# Supplementary material for: Incidence, temporal trend and factors associated with ventilator-associated pneumonia in mainland China: a systematic review and meta-analysis
Source: PubMed Central journal article supplement (PMC5496595; doi:10.1186/s12879-017-2566-7), 2017-07-04
Supplement: 12879_2017_2566_MOESM2_ESM.pdf [file 12879_2017_2566_MOESM2_ESM.pdf]

## Additional File 2: Risk of bias assessment tool

Name of author(s) \_\_\_\_\_ Year of publication \_\_\_\_\_

Name of paper/study \_\_\_\_\_

**Note:** if there is insufficient information in the article to permit a judgment for a particular item, please answer **No (High Risk of Bias)** for that particular item.

| <b>Risk of Bias Item</b>                                                                                                                             | <b>Answer:<br/>Yes (Low Risk of Bias) or<br/>No (High risk of Bias)</b> |
|------------------------------------------------------------------------------------------------------------------------------------------------------|-------------------------------------------------------------------------|
| <b>External Validity</b>                                                                                                                             |                                                                         |
| 1. Was the study's target population a close representation of the national population in relation to relevant variables, e.g. age, sex, occupation? |                                                                         |
| 2. Was the sampling frame a true or close representation of the target population?                                                                   |                                                                         |
| 3. Was some form of random selection used to select the sample, OR, was a census undertaken?                                                         |                                                                         |
| 4. Was the likelihood of non-response bias minimal?                                                                                                  |                                                                         |
| <b>Internal Validity</b>                                                                                                                             |                                                                         |
| 5. Were data collected directly from the subjects (as opposed to a proxy)?                                                                           |                                                                         |
| 6. Was an acceptable case definition of VAP used in the study?                                                                                       |                                                                         |
| 7. Was a reliable and valid diagnosis method for VAP utilized?                                                                                       |                                                                         |
| 8. Was the same mode of data collection used for all subjects?                                                                                       |                                                                         |
| 9. Was the length of the shortest follow-up period for VAP appropriate?                                                                              |                                                                         |
| 10. Were the numerator(s) and denominator(s) for the calculation of the incidence of VAP appropriate?                                                |                                                                         |

**Summary item on the overall risk of study bias**

**Low Risk of Bias:** 8 or more “yes” answers. Further research is very unlikely to change our confidence in the estimate.

**Moderate Risk of Bias:** 6 to 7 “yes” answers. Further research is likely to have an important impact on our confidence in the estimate and may change the estimate.

**High Risk of Bias:** 5 or fewer “yes” answers. Further research is very likely to have an important impact on our confidence in the estimate and is likely to change the estimate.
